# Supplementary material
Source: PubMed Central journal article supplement (PMC6323608)
Supplement: mmc3.pdf [file mmc3.pdf]

# Expanding the Spectrum of BAF-Related Disorders: *De Novo* Variants in *SMARCC2* Cause a Syndrome with Intellectual Disability and Developmental Delay

Keren Machol,<sup>1</sup> Justine Rousseau,<sup>2</sup> Sophie Ehresmann,<sup>2</sup> Thomas Garcia,<sup>2</sup> Thi Tuyet Mai Nguyen,<sup>2</sup> Rebecca C. Spillmann,<sup>3</sup> Jennifer A. Sullivan,<sup>3</sup> Vandana Shashi,<sup>3</sup> Yong-hui Jiang,<sup>4</sup> Nicholas Stong,<sup>5</sup> Elise Fiala,<sup>6</sup> Marcia Willing,<sup>6</sup> Rolph Pfundt,<sup>7</sup> Tjitske Kleefstra,<sup>7</sup> Megan T. Cho,<sup>8</sup> Heather McLaughlin,<sup>8</sup> Monica Rosello Piera,<sup>9</sup> Carmen Orellana,<sup>9</sup> Francisco Martínez,<sup>9</sup> Alfonso Caro-Llopis,<sup>9</sup> Sandra Monfort,<sup>9</sup> Tony Roscioli,<sup>10,11,12</sup> Cheng Yee Nixon,<sup>10</sup> Michael F. Buckley,<sup>11</sup> Anne Turner,<sup>12</sup> Wendy D. Jones,<sup>13</sup> Peter M. van Hasselt,<sup>14</sup> Floris C. Hofstede,<sup>14</sup> Koen L.I. van Gassen,<sup>14</sup> Alice S. Brooks,<sup>15</sup> Marjon A. van Slegtenhorst,<sup>15</sup> Katherine Lachlan,<sup>16,22</sup> Jessica Sebastian,<sup>17</sup> Suneeta Madan-Khetarpal,<sup>17</sup> Desai Sonal,<sup>18</sup> Naidu Sakkubai,<sup>18</sup> Julien Thevenon,<sup>19</sup> Laurence Faivre,<sup>19</sup> Alice Maurel,<sup>19</sup> Slavé Petrovski,<sup>20</sup> Ian D. Krantz,<sup>21</sup> Jennifer M. Tarpinian,<sup>21</sup> Jill A. Rosenfeld,<sup>1</sup> Brendan H. Lee,<sup>1</sup> Undiagnosed Diseases Network, and Philippe M. Campeau<sup>2,\*</sup>

*SMARCC2* (BAF170) is one of the invariable core subunits of the ATP-dependent chromatin remodeling BAF (BRG1-associated factor) complex and plays a crucial role in embryogenesis and corticogenesis. Pathogenic variants in genes encoding other components of the BAF complex have been associated with intellectual disability syndromes. Despite its significant biological role, variants in *SMARCC2* have not been directly associated with human disease previously. Using whole-exome sequencing and a web-based gene-matching program, we identified 15 individuals with variable degrees of neurodevelopmental delay and growth retardation harboring one of 13 heterozygous variants in *SMARCC2*, most of them novel and proven *de novo*. The clinical presentation overlaps with intellectual disability syndromes associated with other BAF subunits, such as Coffin-Siris and Nicolaides-Baraitser syndromes and includes prominent speech impairment, hypotonia, feeding difficulties, behavioral abnormalities, and dysmorphic features such as hypertrichosis, thick eyebrows, thin upper lip vermilion, and upturned nose. Nine out of the fifteen individuals harbor variants in the highly conserved *SMARCC2* DNA-interacting domains (SANT and SWIRM) and present with a more severe phenotype. Two of these individuals present cardiac abnormalities. Transcriptomic analysis of fibroblasts from affected individuals highlights a group of differentially expressed genes with possible roles in regulation of neuronal development and function, namely *H19*, *SCRGI*, *RELN*, and *CACNB4*. Our findings suggest a novel *SMARCC2*-related syndrome that overlaps with neurodevelopmental disorders associated with variants in BAF-complex subunits.

The chromatin-remodeling complex BRG1-associated factor (BAF) plays an essential role in the regulation of gene expression and higher-order chromatin organization by modulating the nucleosome and changing chromatin conformation and accessibility.<sup>1,2</sup> BAFopathies are a heterogeneous group of disorders caused by mutations in the various subunits composing the BAF complex. The clinical phenotypic spectrum of BAFopathies is wide and involves various human neurodevelopmental disorders including syndromic and nonsyndromic intellectual

disability (ID), growth retardation,<sup>3–10</sup> sporadic autism,<sup>11</sup> schizophrenia,<sup>12</sup> and amyotrophic lateral sclerosis.<sup>13</sup>

The most recognizable syndrome associated with BAF abnormalities is Coffin-Siris syndrome (CSS [MIM: 135900]). This is a genetically heterogeneous ID syndrome characterized by developmental delay (DD), speech delay, coarse facial appearance, feeding difficulties, and hypoplastic-to-absent fifth finger nails and fifth distal phalanges.<sup>14</sup> This syndrome is associated with abnormalities in multiple subunits of the BAF complex including the

<sup>1</sup>Department of Molecular and Human Genetics, Baylor College of Medicine, Houston, TX 77030, USA; <sup>2</sup>Department of Pediatrics, CHU Sainte-Justine Research Center and University of Montreal, Montreal, QC H3T 1C5, Canada; <sup>3</sup>Department of Pediatrics, Duke University School of Medicine, Durham, NC 27710, USA; <sup>4</sup>Department of Pediatrics and Neurobiology, Program in Genetics and Genomics, Duke University School of Medicine, Durham, NC 27710, USA; <sup>5</sup>Institute for Genomic Medicine, Columbia University, New York, NY 10032, USA; <sup>6</sup>Department of Pediatrics, Washington University School of Medicine, St. Louis, MO 63110, USA; <sup>7</sup>Human Genetics Department, Radboud University Medical Center, 6500 HB Nijmegen, the Netherlands; <sup>8</sup>GeneDx, Gaithersburg, MD 20877, USA; <sup>9</sup>Unidad de Genética, Hospital Universitario i Politècnico La Fe, 106, 46026 Valencia, Spain; <sup>10</sup>Neuroscience Research Australia (NeuRA), University of New South Wales, Sydney, NSW 2031, Australia; <sup>11</sup>New South Wales Health Pathology, Randwick, NSW 2217, Australia; <sup>12</sup>Centre for Clinical Genetics, Sydney Children's Hospital, Sydney, NSW 2031, Australia; <sup>13</sup>North East Thames Regional Genetics service, Great Ormond Street Hospital for Children NHS Foundation Trust, London WC1N 3JH, UK; <sup>14</sup>Department of Metabolic Diseases, Wilhelmina Children's Hospital, University Medical Center, 3584 EA Utrecht, the Netherlands; <sup>15</sup>Department of Clinical Genetics, Erasmus Medical Center, 3015 GD Rotterdam, the Netherlands; <sup>16</sup>Wessex Clinical Genetics Service, University Hospital Southampton NHS Foundation Trust, Southampton SO16 5YA, UK; <sup>17</sup>Department of Medical Genetics, Children's Hospital of Pittsburgh of UPMC, Pittsburgh, PA 15224, USA; <sup>18</sup>Department of Neurogenetics, Kennedy Krieger Institute, Baltimore, MD 21205, USA; <sup>19</sup>Centre de Génétique, Centre de Référence Anomalies du Développement et Syndromes Malformatifs de l'Interrégion Est et FHU TRANSLAD, CHU Dijon, 21079 Dijon, France; <sup>20</sup>AstraZeneca Centre for Genomics Research, Precision Medicine and Genomics, IMED Biotech Unit, AstraZeneca, Cambridge CB2 0AA, UK; <sup>21</sup>Department of Pediatrics and Division of Human Genetics, The Children's Hospital of Philadelphia and the Perelman School of Medicine at The University of Pennsylvania, Philadelphia, PA 19104, USA; <sup>22</sup>Human Genetics and Genomic Medicine, Faculty of Medicine, University of Southampton, Southampton SO17 1BJ, UK

\*Correspondence: [p.campeau@umontreal.ca](mailto:p.campeau@umontreal.ca)

<https://doi.org/10.1016/j.ajhg.2018.11.007>

© 2018 American Society of Human Genetics.

ATPase subunit SMARCA4 (MIM: 603254), the common core subunit SMARCB1 (MIM: 601607), and BAF accessory subunits such as SMARCE1/BAF57 (MIM: 603111), ARID1A (MIM: 603024), ARID1B (MIM: 614556),<sup>15</sup> ARID2 (MIM: 609539),<sup>16</sup> and DPF2 (MIM: 601671).<sup>17</sup> CSS can result of pathogenic changes in other chromatin remodeling proteins with no direct interaction with BAF complex, including SOX11 (MIM: 600898)<sup>18</sup> and PHF6 (MIM: 300414).<sup>19</sup>

Other BAFopathies include Nicolaides-Baraitser syndrome (MIM: 601358) caused by pathogenic variants in *SMARCA2* (MIM: 600014) that has a significant phenotypic overlap with CSS and is characterized by ID, sparse hair, short stature, microcephaly, brachydactyly, interphalangeal joint swellings, and epilepsy.<sup>20,21</sup> Some individuals with clinical diagnosis of DOORS syndrome (MIM: 220500), characterized by deafness, onychodystrophy, osteodystrophy, ID, and seizures, were found to carry pathogenic variants in *SMARCB1* (MIM: 601607), highlighting the clinical overlap between CSS and DOORS syndrome.<sup>22</sup> We have previously reported mutations in another BAF subunit, *ACTL6A* (MIM: 604958), to be associated with ID.<sup>23</sup> Pathogenic variants in *ADNP* (MIM: 611386), encoding a transcription factor that interacts with the BAF complex, have been identified in individuals presenting dysmorphic facial features, autism spectrum disorder (ASD), ID, hypotonia, and congenital heart defects.<sup>24</sup> Detailed phenotypic and genetic comparison between the different BAF-related syndromes has been discussed elsewhere.<sup>4,25</sup>

*SMARCC2* (MIM: 601734) encodes BAF170, a common core subunit of the BAF complexes with high homology to *SMARCC1* (BAF155).<sup>26</sup> It is an intrinsic factor of glial radial cells and plays a crucial role in embryogenesis and corticogenesis, determining the mammalian body and cortical size.<sup>27</sup> *Smarcc2;Smarcc1* double knockout mice demonstrated proteasome-mediated degradation of the entire BAF complexes, resulting in impairment of the global epigenetic and gene expression program of forebrain development.<sup>28</sup> Recently, deletion of *Smarcc2* in mice revealed its role in learning and behavioral adaptation.<sup>29</sup> *SMARCC2* was also reported as one of the chromatin-remodeling genes involved in ASD.<sup>30</sup> Despite its significant biological role, variants in *SMARCC2* have not been directly associated with a syndrome in humans previously.

We report 15 unrelated individuals (Tables 1 and S1) with variants in *SMARCC2*, detected by whole-exome sequencing (WES), and with clinical presentation that includes mild to severe ID (HP:0012736), DD with prominent speech delay (HP:0000750), behavioral abnormalities (HP:0000708), growth retardation (HP:0008897), feeding difficulties at the neonatal period (HP:0008872), hypotonia (HP:0011398), and dysmorphic features including hypertrichosis (HP:0000998), thick eyebrows (HP:0000574)/prominent supra-orbital ridges (HP:0000336), and thin upper and lower vermilion (HP:0000233), suggesting overlap with Coffin-Siris and Nicolaides-Baraitser syndromes. Sub-

jects in this cohort were gathered using GeneMatcher.<sup>31</sup> All individuals' families from the different institutions agreed to participate in this study and signed appropriate consent forms. Permission for clinical photographs was given separately. Individual 4 has been reported before and was identified in a gene panel screening (1,256 genes) of 96 individuals with ID.<sup>32</sup> The variant c.1833+2T>C in individual 10 was reported before as part of a work to identify new gene-disease associations in trio WES from 119 undiagnosed individuals.<sup>33</sup> Individuals 1, 4, 6, 7, 9–13, and 15 had trio WES. Individuals 2, 3, 5, and 14 had a proband WES followed by Sanger confirmation for the individual and parents. Biological parents of individuals 3 and father of individual 8 are not available for testing. Individual 8 had duo WES with his mother and results were re-analyzed as part of the Undiagnosed Diseases Network (UDN). This individual was found to harbor an intronic splice site variant c.1833+1G>T in *SMARCC2* that was not found in his mother. Twelve of the fifteen individuals have proven *de novo* variants in *SMARCC2*. Individual 2 inherited the variant from his affected father. Paternal grandparents were negative for the variant indicating a *de novo* variant in the father.

All of the individuals presented here have some degree of ID and/or DD (Tables 1 and S1). Ten (10/15, 65%) have moderate to profound DD and ID while the other five individuals have only mild ID or mild DD. 13/15 (86%) individuals have speech impairment with 7 of them completely lacking language. Most individuals present muscle tone abnormalities. 13/15 (85%) individuals present significant hypotonia, while two of the individuals present high tone or spasticity. Ten of the individuals (67%) present behavioral problems including aggression and self-injurious behavior as well as hyperactivity, hypersensitivity to touch, sleep disturbances, and obsessive and rigid behavior. Two were noted to have difficulties in social interactions, yet not qualified for formal diagnosis of autism. Eight individuals present feeding difficulties and six of them have mostly postnatal growth retardation. Individual 9 has continuous feeding difficulties with laryngomalacia and nasal feeding tube since age 14 months. 11 out of the 15 individuals are reported to have dysmorphic craniofacial features (Figure 1). The most pronounced dysmorphic features are hypertrichosis (6/15), thick eyebrows/prominent supra-orbital ridges (6/15), thin upper or thick lower lip- vermilion (6/15 and 5/15, respectively), and upturned nose (6/15). Most of the individuals have normal fifth finger/toe and finger/toenail.

8 of the 15 individuals presented here (1, 5–7, 11–14) have one of seven missense variants in *SMARCC2* (GeneBank: NM\_003075.3) and all are predicted to be deleterious/probably damaging according to PROVEAN and SIFT, *in silico* tools to predict the functional effect of an amino acid substitution. All missense variants are in well-conserved amino acids in *SMARCC2* (Figure 2). *In vitro* missense tolerance ratio (MTR) tool shows that six of the seven missense variants presented here preferentially

affect one of the 25% most intolerant residues of *SMARCC2* ( $p = 0.0004$ ) with p.Asn134Asp being the only missense variant affecting a tolerant region of this gene (Figure S1). This might be consistent with the milder phenotype presented in this individual. *SMARCC2* ExAC z-score for intolerance for missense variations is significantly high (4.26) and the gene is predicted to be potentially associated with dominant conditions according to an LDA score of 2.435 by the DOMINO algorithm.<sup>34</sup> Individual 15 harbors a *de novo* in-frame deletion of methionine 1153 (c.3456\_3458delCAT). Methionine 1153 deletion and its missense substitutions to various amino acids (isoleucine, threonine, valine) appear once (allele frequency  $3.231 \times 10^{-5}$ ) and four times, respectively, in gnomAD.<sup>35</sup> This might indicate that this position is relatively tolerable for changes and explain the mild clinical presentation of individual 15. It is important to note that detailed phenotype such as IQ scores are not available for individuals included in the ExAC database.

Individuals 2 and 3 carry truncating mutations located at the N terminus of *SMARCC2* (exons 9 and 11). Individual 2 carries a heterozygous nonsense variant (p.Trp241\*) and individual 3 carries a frameshift variant (p.Glu334Argfs\*49). Interestingly, both present mild phenotype. Individual 2, who presents mainly behavioral abnormalities and only mild DD, inherited the change from his affected father who presents with borderline intelligence (IQ of 72) and behavior problems. ExAC database identified only a single loss-of-function allele in *SMARCC2* (p.Glu389Aspfs\*5); however, with only 11 (22%) of 49 reads at this frameshift variant site, it is unlikely to be a germline variant (binomial exact test for 50% germline heterozygous expectation;  $p = 0.0001$ ). The depletion of protein-truncating variants in *SMARCC2* is evident in large human population reference cohorts. Based on the ExAC cohort, *SMARCC2* achieves a LoF depletion FDR adjusted  $p = 5.5 \times 10^{-11}$ , ranking it among the 1.6% most significantly LoF-depleted genes in the human exome.<sup>36</sup> It also has a probability of loss-of-function (LoF) intolerance (pLI) score of 1, supporting deleterious effect for predicted LoF pathogenic variants.<sup>35</sup> *SMARCC2*%HI score of 20.29 also predicts that this gene is less likely to tolerate a loss-of-function variant or deletion.<sup>37</sup>

Four individuals harbor splicing variants. Three individuals (8–10) have one of two variants in intron 19 (c.1833+2T>C and c.1833+1G>T) that are predicted *in silico* to affect splicing donor site according to Human Splicing Finder (HSF). One individual (4) presents a splicing variant in intron 14 (c.1311–3C>G) that is predicted to affect exon acceptor site. *In vitro* assay in lymphocytes from individual 8 (c.1833+1G>T) indicates that this variant leads to abnormal splicing with deletion of exon 19 (amino acids 590–611) that compose the SANT domain in *SMARCC2* (Figure 3A). The capture of a shorter cDNA product using RT-PCR might indicate the presence of an mRNA escaping nonsense-mediated decay (NMD). RT-qPCR quantification of *SMARCC2* in lymphocytes from in-

dividual 4 (c.1311–3C>G) demonstrates a ~50% decrease in mRNA compared to a control and a coding in-frame deletion (individual 15, p.Met1153del), suggesting haploinsufficiency through NMD (Figure 3B).

Nine individuals carry missense or splicing variants in the highly conserved SWIRM (Swi3, Rsc8, and Moira) and SANT (Swi3, Ada2, NCoR, and TFIIB) domains of *SMARCC2* (Figure 2). The SWIRM domain interacts with DNA, binds di-nucleosome structures, and mediates specific protein-protein interactions.<sup>38</sup> The SANT domain has DNA-binding activity<sup>39</sup> and is believed to function as a histone tail binding module.<sup>40</sup> Eight of the individuals reported here have a heterozygous novel variant in the SANT domain of *SMARCC2*. One individual has a missense variant changing leucine for proline in position 609 (p.Leu609Pro), two have a missense variant changing leucine for proline in position 610 (p.Leu610Pro), one individual has a missense variant changing leucine for proline in position 613 (p.Leu613Pro), and one has a missense variant changing cysteine to arginine in position 635 (p.Cys635Arg). Three individuals have one of two intronic variants that are predicted *in silico* to affect the same splicing donor site in SANT and one individual presents a splicing variant at the SWIRM domain. This group of nine individuals present with moderate to severe DD and ID and with severe speech impairment, with six of them having no language at all. Five out of these nine individuals (55%) have abnormal brain MRI findings including small corpus callosum and generalized cerebral atrophy. Five out of the nine present significant growth retardation and four of them have seizure disorder. It seems that individuals carrying a pathogenic variant in SWIRM or SANT domains have a more severe presentation. Interestingly, only the two individuals harboring the p.Leu610Pro variant have cardiovascular abnormalities. An echocardiogram for individual 6 revealed distended left coronary artery and for individual 7 mild non-progressive dilatation of the ascending aorta (Z score of 2.54).

To further investigate the pathogenicity of the variants, we calculated the geometric mean distance between the observed mutations to assay the clustering of the mutations.<sup>41</sup> As this calculation considers only the length of the spliced transcript, intronic splicing mutations were annotated according to the closest coding nucleotide. Compared to ten million random permutations of mutations along the transcript, the observed mutations are significantly clustered ( $p$  value  $10^{-7}$ ), suggesting a pathomechanism that does not operate through haploinsufficiency alone. Interestingly, removing the frameshift and nonsense mutations from the analysis does not affect the significance, but taking out the splicing mutations does ( $p$  value 0.12). This result points toward a more important role in the pathogenicity for the SWIRM and SANT domains than for the *SMARCC\_N* region, and a corollary of this interpretation is the hypothesis that expressed but incorrectly spliced transcripts could function through a dominant-negative mechanism.

**Table 1. Summary of SMARCC2 Variants and Clinical Presentation of 15 Individuals**

| Individual #                                       | # 1         | # 2                                            | # 3               | # 4 <sup>a</sup>    | # 5                                                                         | # 6                                                         | # 7                                           | # 8                           | # 9                 | # 10 <sup>b</sup>               | # 11                     | # 12                                                          | # 13               | # 14         | # 15                 | Total |
|----------------------------------------------------|-------------|------------------------------------------------|-------------------|---------------------|-----------------------------------------------------------------------------|-------------------------------------------------------------|-----------------------------------------------|-------------------------------|---------------------|---------------------------------|--------------------------|---------------------------------------------------------------|--------------------|--------------|----------------------|-------|
| Gender                                             | M           | M                                              | M                 | F                   | M                                                                           | F                                                           | M                                             | M                             | M                   | M                               | M                        | F                                                             | M                  | M            | M                    |       |
| Age (Y)                                            | 5 Y         | 3 Y                                            | 2 Y               | 17 Y                | 4 Y                                                                         | 18 Y                                                        | 11 Y                                          | 11 Y                          | 2.5 Y               | 10.5 Y                          | 19 Y                     | 7 Y                                                           | 8 Y                | 5 Y          | 27 Mo                |       |
| Nucleotide change                                  | c.400A>G    | c.723G>A                                       | c.999dupA         | c.1311–3C>G         | c.1826T>C                                                                   | c.1829T>C                                                   | c.1829T>C                                     | c.1833+1G>T                   | c.1833+2T>C         | c.1833+2T>C                     | c.1838T>C                | c.1903T>C                                                     | c.2686A>G          | c.2699A>G    | c.3456_3458delCAT    |       |
| Amino acid change                                  | p.Asn134Asp | p.Trp241*                                      | p.Glu334 Argfs*49 | splicing variant    | p.Leu609Pro                                                                 | p.Leu610Pro                                                 | p.Leu610Pro                                   | splicing variant <sup>c</sup> | splicing variant    | splicing variant                | p.Leu613Pro              | p.Cys635Arg                                                   | p.Met896Val        | p.Glu900Gly  | p.Met1153del         |       |
| <i>De novo</i> variant?                            | yes         | no (affected father)                           | n/a               | yes                 | yes                                                                         | yes                                                         | yes                                           | n/a                           | yes                 | yes                             | yes                      | yes                                                           | yes                | yes          | yes                  |       |
| Affected domain                                    | SMARCC_N    | SMARCC_N                                       | SMARCC_N          | SWIRM               | SANT                                                                        | SANT                                                        | SANT                                          | SANT                          | SANT                | SANT                            | SANT                     | SANT                                                          | SMARCC_C           | SMARCC_C     | carboxy terminal     |       |
| <b>Neurodevelopmental Abnormalities</b>            |             |                                                |                   |                     |                                                                             |                                                             |                                               |                               |                     |                                 |                          |                                                               |                    |              |                      |       |
| Developmental delay and/or intellectual disability | mild DD     | mild DD                                        | mild DD           | severe DD           | severe DD                                                                   | severe DD                                                   | severe DD                                     | severe DD (DQ=20)             | moderate ID         | moderate DD, moderate-severe ID | moderate-severe DD       | moderate DD, moderate ID                                      | moderate-severe DD | mild ID      | mild DD              | 15/15 |
| Speech impairment                                  | –           | speech delay                                   | –                 | absence of language | absence of language                                                         | absence of language                                         | absence of language                           | absence of language           | absence of language | minimal speech                  | absence of language      | speech delay                                                  | speech delay       | speech delay | speech abnormalities | 13/15 |
| Behavioral abnormalities                           | –           | +                                              | +                 | +                   | +                                                                           | –                                                           | +                                             | +                             | –                   | –                               | –                        | +                                                             | +                  | +            | +                    | 10/15 |
| Hypotonia                                          | +           | spasticity                                     | +                 | +                   | + and spasticity                                                            | +                                                           | +                                             | +                             | +                   | +                               | –                        | +                                                             | +                  | +            | +                    | 13/15 |
| Seizures                                           | –           | –                                              | –                 | +                   | +                                                                           | –                                                           | +                                             | –                             | –                   | –                               | +                        | –                                                             | –                  | –            | –                    | 4/15  |
| Movement disorder                                  | –           | +                                              | –                 | –                   | –                                                                           | +                                                           | –                                             | –                             | –                   | –                               | –                        | –                                                             | –                  | –            | –                    | 2/15  |
| CNS abnormalities on MRI                           | n/a         | two discrete hyperintense white matter lesions | n/a               | normal MRI          | thinning of corpus callosum and splenium, periventricular white matter loss | generalized cerebral atrophy, hypointensity globus pallidus | generalized cerebral atrophy, hypomyelination | normal MRI                    | normal MRI          | normal MRI                      | abnormal corpus callosum | slightly small corpus callosum, prominent perivascular spaces | normal MRI         | normal MRI   | n/a                  | 6/12  |
| <b>Growth</b>                                      |             |                                                |                   |                     |                                                                             |                                                             |                                               |                               |                     |                                 |                          |                                                               |                    |              |                      |       |
| FTT                                                | –           | –                                              | –                 | –                   | +                                                                           | +                                                           | +                                             | –                             | +                   | +                               | –                        | –                                                             | –                  | +            | –                    | 6/15  |
| Sucking/feeding difficulty                         | –           | –                                              | –                 | –                   | +                                                                           | +                                                           | +                                             | –                             | +                   | +                               | +                        | –                                                             | –                  | +            | +                    | 8/15  |
| <b>Craniofacial Features</b>                       |             |                                                |                   |                     |                                                                             |                                                             |                                               |                               |                     |                                 |                          |                                                               |                    |              |                      |       |
| Thin/sparse scalp hair                             | –           | –                                              | –                 | –                   | +                                                                           | +                                                           | –                                             | –                             | +                   | –                               | +                        | –                                                             | –                  | –            | –                    | 4/15  |

(Continued on next page)

**Table 1. Continued**

| Individual #                          | # 1 | # 2                                       | # 3 | # 4 <sup>a</sup> | # 5    | # 6                      | # 7                                                    | # 8 | # 9                   | # 10 <sup>b</sup>                       | # 11                                   | # 12   | # 13 | # 14 | # 15 | Total |
|---------------------------------------|-----|-------------------------------------------|-----|------------------|--------|--------------------------|--------------------------------------------------------|-----|-----------------------|-----------------------------------------|----------------------------------------|--------|------|------|------|-------|
| Hypertrichosis                        | -   | -                                         | -   | +                | +      | -                        | -                                                      | -   | +                     | -                                       | -                                      | +      | +    | +    | -    | 6/15  |
| Thick eyebrows                        | -   | -                                         | -   | +                | -      | +                        | +                                                      | -   | +                     | -                                       | +                                      | -      | -    | +    | -    | 6/15  |
| Long eyelashes                        | -   | -                                         | -   | -                | -      | -                        | -                                                      | -   | +                     | +                                       | +                                      | -      | +    | +    | -    | 5/15  |
| Ptosis                                | -   | -                                         | -   | -                | -      | +                        | +                                                      | -   | -                     | +                                       | +                                      | -      | -    | +    | -    | 5/15  |
| Thin upper lip vermillion             | -   | -                                         | -   | -                | +      | +                        | -                                                      | +   | +                     | -                                       | -                                      | +      | +    | -    | -    | 6/15  |
| Thick lower lip vermillion            | -   | -                                         | -   | +                | -      | -                        | +                                                      | -   | +                     | -                                       | +                                      | -      | +    | -    | -    | 5/15  |
| Palate abnormalities                  | -   | -                                         | -   | -                | -      | -                        | -                                                      | -   | -                     | +                                       | +                                      | -      | -    | +    | -    | 3/15  |
| Nose upturned/ anteverted nostrils    | -   | -                                         | -   | -                | +      | +                        | +                                                      | -   | -                     | +                                       | +                                      | +      | -    | -    | -    | 6/15  |
| <b>Skeletal-Limb Features</b>         |     |                                           |     |                  |        |                          |                                                        |     |                       |                                         |                                        |        |      |      |      |       |
| 5th finger or toe/nails abnormalities | -   | -                                         | -   | -                | +      | -                        | -                                                      | -   | -                     | +                                       | +                                      | -      | -    | +    | -    | 4/15  |
| Scoliosis                             | -   | -                                         | -   | kyphosis         | +      | +                        | +                                                      | -   | -                     | -                                       | -                                      | +      | -    | -    | -    | 5/15  |
| <b>Other</b>                          |     |                                           |     |                  |        |                          |                                                        |     |                       |                                         |                                        |        |      |      |      |       |
| Cardiovascular                        | n/a | -                                         | -   | -                | n/a    | left coronary distension | non-progressive mild aortic dilatation (Z score=2.54). | -   | -                     | -                                       | -                                      | -      | n/a  | -    | n/a  | 2/11  |
| Inguinal hernia                       | -   | -                                         | -   | -                | +      | -                        | +                                                      | +   | -                     | -                                       | -                                      | -      | -    | -    | -    | 3/15  |
| Undescended testis                    | n/a | -                                         | -   | n/ap             | +      | n/ap                     | +                                                      | -   | n/a                   | -                                       | -                                      | n/ap   | -    | -    | n/a  | 2/12  |
| Skin problems                         | -   | hypo pigmented hair, cafe au lait macules | -   | -                | eczema | eczema, scleroderma      | -                                                      | -   | hypo-melanotic macula | vitiligo (present in unaffected father) | hyper pigmented irregular skin on back | eczema | -    | -    | -    | 7/15  |

Abbreviations: FTT, failure to thrive; DD, developmental delay; ID, intellectual disability; DQ, developmental quotient; CNS, central nervous system; MRI, magnetic resonance imaging; M, male; F, female; Y, years; Mo, months; n/a, not available information; n/ap, not applicable. Minus sign (-), not reported in this individual; plus sign (+), reported in this individual.

<sup>a</sup>See Martinez et al.<sup>32</sup>

<sup>b</sup>See Zhu et al.<sup>33</sup>

<sup>c</sup>See Figure 3.



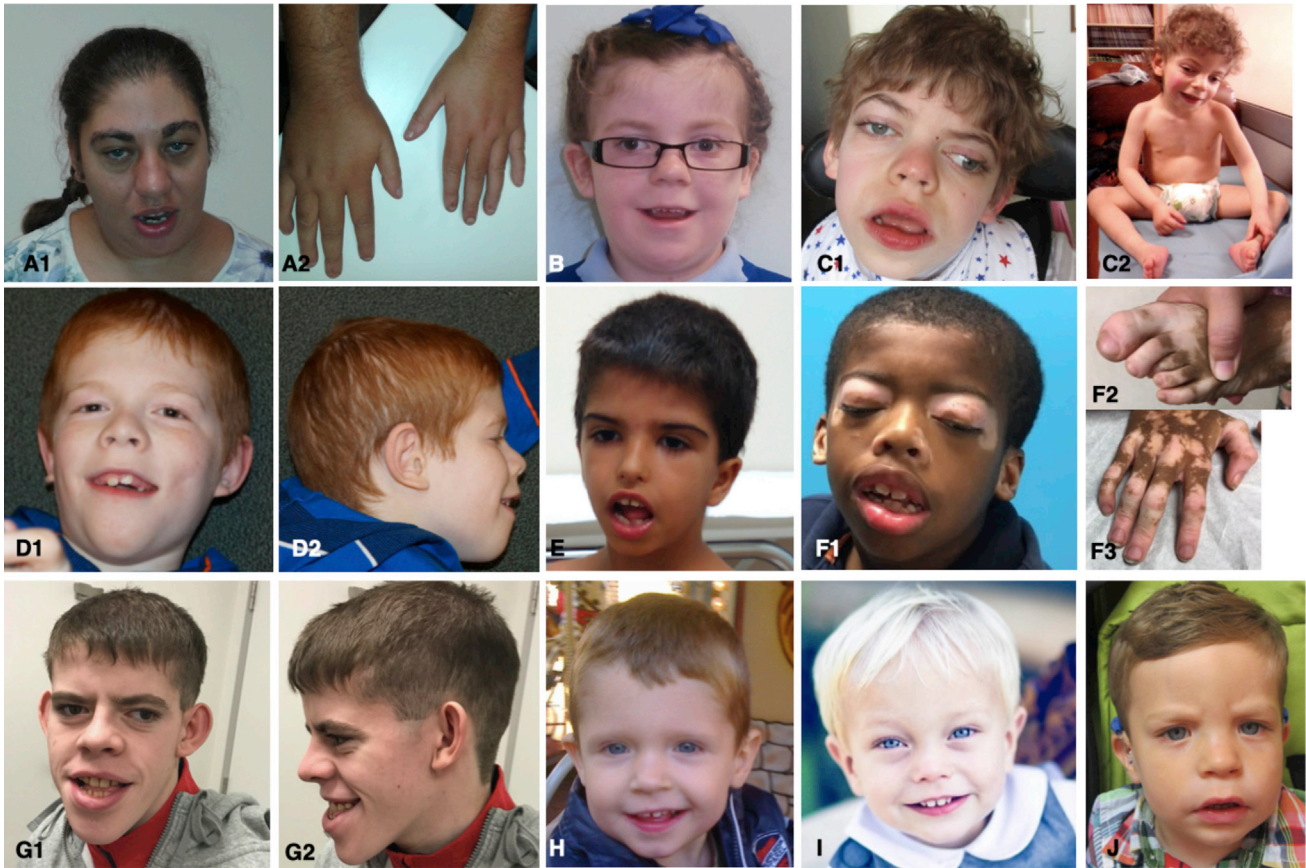

**Figure 1. Pictures of Ten of the Individuals with *SMARCC2* Variants**

- (A) Individual 4 (c.1311–3C>G) at 17 years of age.  
 (B) Individual 12 (p.Cys635Arg) at 7 years of age.  
 (C) Individual 7 (p.Leu610Pro) at 11 years of age.  
 (D) Individual 8 (c.1833+1G>T) at 11 years.  
 (E) Individual 14 (p.Glu900Gly) at 5 years of age.  
 (F) Individual 10 (c.1833+2T>C) at 10.5 years of age (father of this individual presents vitiligo as well).  
 (G) Individual 11 (p.Leu613Pro) at 19 years of age.  
 (H) Individual 2 (p.Trp241\*) at 3 years of age.  
 (I) Individual 3 (p.Glu334Argfs\*49) at 2 years of age.  
 (J) Individual 15 (p.Met1153del) at 2 years of age.

Note coarse facial features (A, C, G), thick eyebrows/prominent supra-orbital ridges, long eyelashes, upturned nose, open mouth with thin upper lip vermillion, and hypertrichosis. Note lateral commissures creating skin indentation seen among most affected individuals. Note camptodactyly of 5th fingers and toes (F2, F3).

To better understand the impact of *SMARCC2* mutations on gene expression, we performed an RNA-seq analysis on fibroblasts from individual 1 with p.Asn134Asp mutation and individual 7 with p.Leu610Pro mutation. We analyzed both samples together to assess shared differential gene expression patterns. Analysis of differentially expressed genes (DEGs) shows an almost equal amount of DEGs upregulated and downregulated in these two individuals (Figure 4A). Gene Ontology (GO) analysis of these DEGs using the GOrilla web application demonstrates a significant enrichment in genes related to embryonic morphogenesis, multicellular organismal process, and developmental process (Figure 4C). Among the shared DEGs between the two tested individuals, we identified genes with possible role in regulation of neuronal development and function, namely *H19*, *SCRG1*, *RELN*, and *CACNB4*.

*H19* codes for a long noncoding RNA and is among the most upregulated DEGs ( $\log_2FC = 7.4$ ,  $padj = 7.18 \times 10^{-43}$ ) in both individuals compared to control subjects (Table S2). *H19* is an imprinted gene and has been implicated in the regulation of growth and embryonic development, tumorigenesis, and epilepsy-induced astrocyte and microglia activation.<sup>42–44</sup> Interestingly, knocking down *SMARCA4* in MCF10A epithelial cell line also results in significant *H19* upregulation<sup>1</sup> suggesting that *H19* expression is affected by BAF complex modification and that *SMARCC2* p.Asn134Asp and p.Leu610Pro mutations could indeed affect the complex integrity and/or function.

*SCRG1* is another significant DEG ( $\log_2FC = 5.43$ ,  $padj = 9.30 \times 10^{-13}$ ) mainly expressed in the human brain, and its level is highly regulated during postnatal development, being absent in the fetal brain.<sup>45</sup> Duplication of the gene

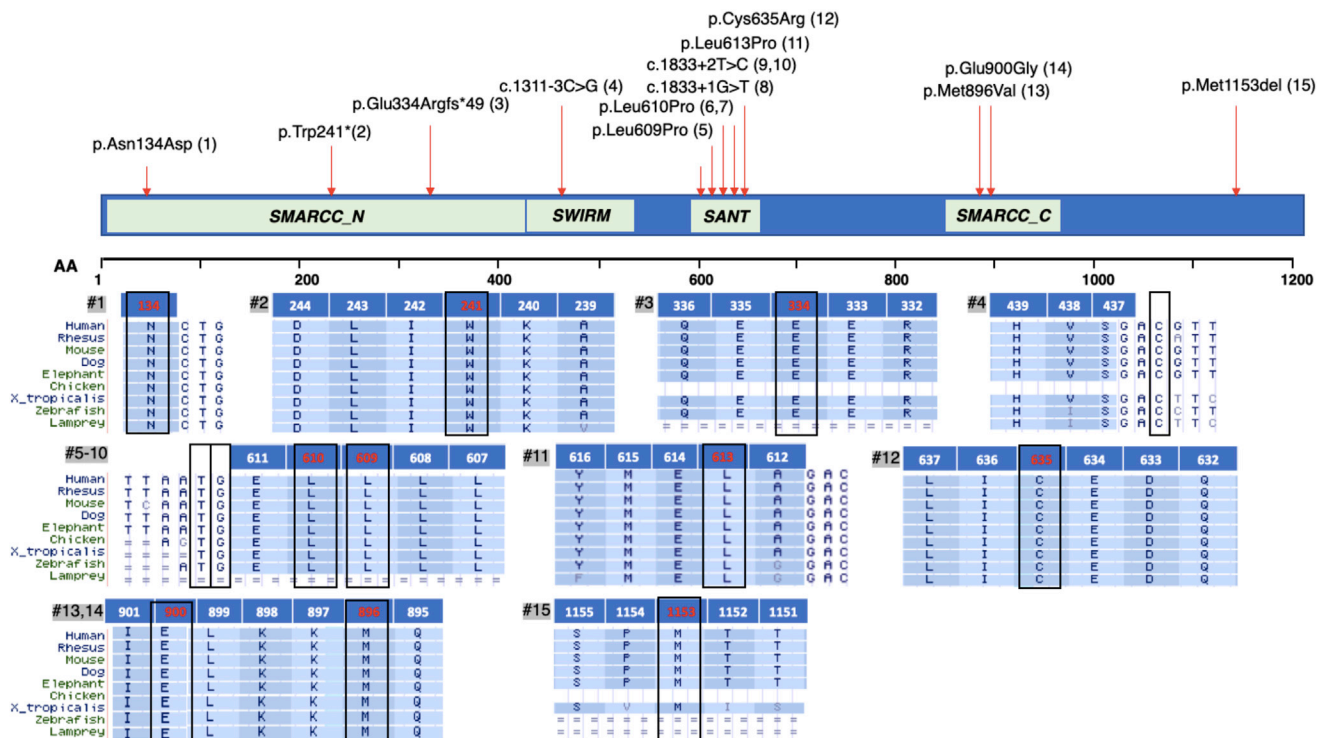

**Figure 2. SMARCC2 (BAF170) Main Domains and Variants**

Amino acid alignments demonstrate that the missense variants affect highly conserved amino acids and the variants causing splicing abnormalities affect highly conserved nucleotides (GenBank: NP\_003066, transcript ENST00000267064.8). The involved amino acids/nucleotides are framed in black. Number of relevant individual (#) is on gray background. For intron/exon location of the different variants, see [Table S1](#).

has been suggested to contribute to ID.<sup>46</sup> In human mesenchymal stem cells, *SCRGI* expression is important for the maintenance of self-renewal and preventing osteoblastic differentiation.<sup>47</sup> Interestingly, impaired postnatal radial glial cells self-renewal was observed in conditional *Smarcc2*-deficient animals,<sup>29</sup> and abolishing the expression of *Smarca4* or *Smarcc2* in postnatal neuronal stem cells results in preferential onset of gliogenesis instead of neurogenesis.<sup>29,48</sup>

Another overexpressed gene is *RELN* ( $\log_2FC = 3.72$ ,  $\text{padj} = 3.39 \times 10^{-4}$ ), which encodes Reelin, a large secreted matrix serine protease that is involved in layering of neurons in the cortex and cerebellum. It also regulates microtubule function in neurons and neuronal migration, and its enzymatic activity is important for the modulation of cell adhesion. Recessive *RELN* mutations cause lissencephaly (MIM: 257320), while dominant mutations cause epilepsy (MIM: 616436).<sup>49</sup>

Finally, *CACNB4*, which also has significantly increased expression ( $\log_2FC = 3.52$ ,  $\text{padj} = 1.88 \times 10^{-7}$ ), encodes a beta auxiliary subunit of voltage-gated calcium ions channels. Calcium channels play an essential role in the nervous system for neurotransmitter release as well as the regulation of gene expression.<sup>50,51</sup> Interestingly, *CACNB4* was shown to translocate to the nucleus to regulate gene expression.<sup>52,53</sup> Different isoforms of the  $\beta$ -subunit of voltage-gated calcium ions channels have been shown to

control the transcription of genes by recruiting proteins involved in DNA remodeling such as the heterochromatin protein 1.<sup>54</sup> Also, the  $\beta$ -subunit was reported to downregulate Wnt signaling, a crucial player in neural development,<sup>55</sup> through interaction with the transcription factor TCF4 which is associated with Pitt-Hopkins syndrome (MIM: 610954).<sup>53</sup> Mutations in other subunits of voltage-gated channels have been associated with mental disorders, autism spectrum disorders (ASD), and cardiovascular problems.<sup>56–59</sup> In humans, *CACNB4* mutations have been associated with episodic ataxia (MIM: 613855) and juvenile myoclonic and idiopathic generalized epilepsy (MIM: 607682).

To validate the relevance of our results and to understand the low overlap between DEGs in the two assessed individuals, we compared our results to other public datasets involving BAF-complex components. We looked at datasets in both human and mouse cell lines and primary cells in culture ([Figure S2](#)).<sup>1,60–63</sup> The number of DEGs varies significantly between assays from just 18 to 3,038. We calculated and plotted the overlapping genes for each dataset, showing varying degrees of overlap (0% to 83%) suggesting a great heterogeneity in genes affected by BAF-complex defects, in both a subunit- and a cell type-specific manner. Thus, we hypothesize that pathogenic mutations in different domains of the same subunit, as seen in the two individuals assessed in our study, could

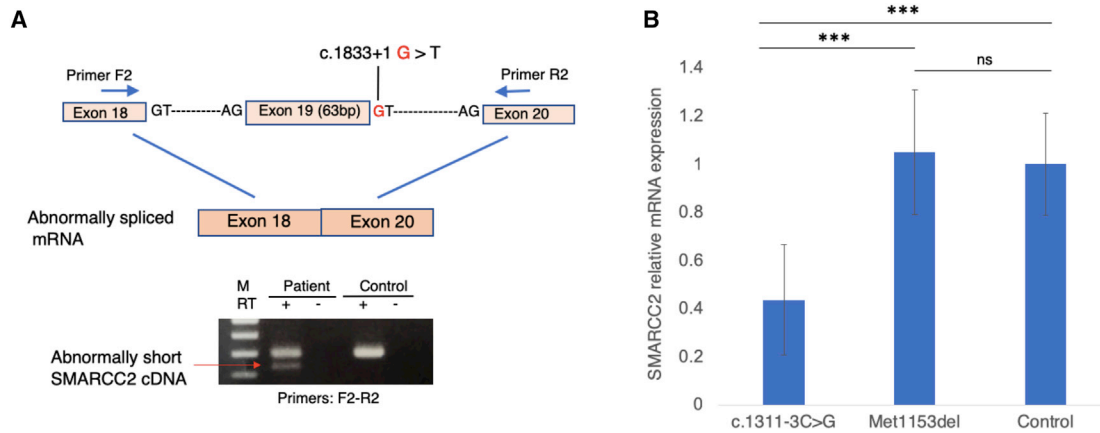

**Figure 3. Splicing Variants Analyses in Individuals 8 and 4**

(A) PCR amplification of cDNA from individual 8 at exons 18 to 20 reveals deletion of exon 19 (amino acids 590–611) due to splicing variant c.1833+1G>T in *SMARCC2* (GenBank: NM\_003075).

(B) *SMARCC2* gene expression was quantified by qRT-PCR from lymphoblastoid cell lines (LCLs) for individuals 4 and 15 and an unrelated control subject, in triplicates. *SMARCC2* expression was normalized to *GAPDH*, and results are represented as relative expression normalized to the control. Error bars represent SEM (standard error of the mean) and significance was assessed with bilateral unpaired Student's *t* tests.

lead to different gene expression patterns as they could affect the interaction with unique subunits or transcription factors and could explain the low overlap we obtained. Still, 48% of the DEGs in *SMARCC2* individuals' fibroblasts are found in at least one other dataset, suggesting some commonalities, and confirming a general BAF-complex-linked transcriptomic profile.

Spatiotemporal regulation of the different subunits assembly and the activity of the BAF complex are well orchestrated and essential to enable normal development and proper functioning of the nervous system.<sup>2,64,65</sup> With the exception of impaired cognitive function observed in *Smarcc2*-deficient mice, no mutations in *SMARCC2* have been associated with a particular phenotype/disease. Here we show that mutations in *SMARCC2* affect gene expression, and in particular a subset of putative genes potentially implicated in neurogenesis and proper functioning of the nervous system, namely *H19*, *SCRG1*, *RELN*, and *CACNB4*. Our results further suggest that mutations of *SMARCC2* may regulate pathways important for postnatal gliogenesis, differentiation, and function of astrocytes and oligodendrocytes. Further studies need to be undertaken in other models to determine the role of these genes in individuals affected by *SMARCC2* mutations.

Neurodevelopmental disorders associated with pathogenic variants in BAF chromatin remodeling complex subunits present overlapping clinical phenotype. Comparing the clinical presentation of the different associated conditions (Table 2<sup>3,4,23,66–69</sup>) emphasizes the wide clinical spectrum of the disorders and the importance of trio WES in the diagnostic process. Other than our observation that missense and splicing variants in the highly conserved SANT and SWIRM domains uniformly lead to a severe phenotype, we could not point

out a clear genotype-phenotype correlation. Missense variants outside of these two domains were found mostly but not exclusively in individuals with mild presentation, suggesting variable degree of effect on BAF-complex function for missense variants. Pathogenic variants reported in SMARC subunits (*SMARCA2*, *SMARCA4*, *SMARCB1*, and *SMARCE1*) are mostly missense and in-frame deletions (Table 2) with dominant-negative effect mechanism causing Coffin-Siris and CS-like syndromes.<sup>8,25</sup> Recently, mutations identified in BAF-subunit DPF2 were suggested to cause CSS-like phenotype in a dominant-negative mechanism related both to missense and splicing/truncating variants through NMD escape.<sup>17</sup>

Given that *SMARCC1* and *SMARCC2* are paralogous genes, that they can form heterodimers or homodimers,<sup>70</sup> and that both share functional scaffolding properties,<sup>28</sup> it is conceivable that *SMARCC1* could at least partially compensate for the loss of *SMARCC2* leading to a milder phenotype in case subjects with truncating mutations in the SMARCC N-terminal region. Nevertheless, our results also suggest that the mutant mRNA of individual 4 (c.1311–3C>G) undergoes NMD as one of the consequences of the splice site mutation, thereby indicating that haploinsufficiency can also be seen in individuals with a severe phenotype. As neither RNA nor cells were available for these individuals with N-terminal truncating mutation, we cannot exclude the possibility that the mRNA could escape NMD and the truncated protein remained functional to perform essential function or to allow for a compensatory mechanism to take place. Finally, different *SMARCC2* isoforms could be expressed in different tissues or at different times during development, so the location of truncating mutations could affect the phenotype depending on the



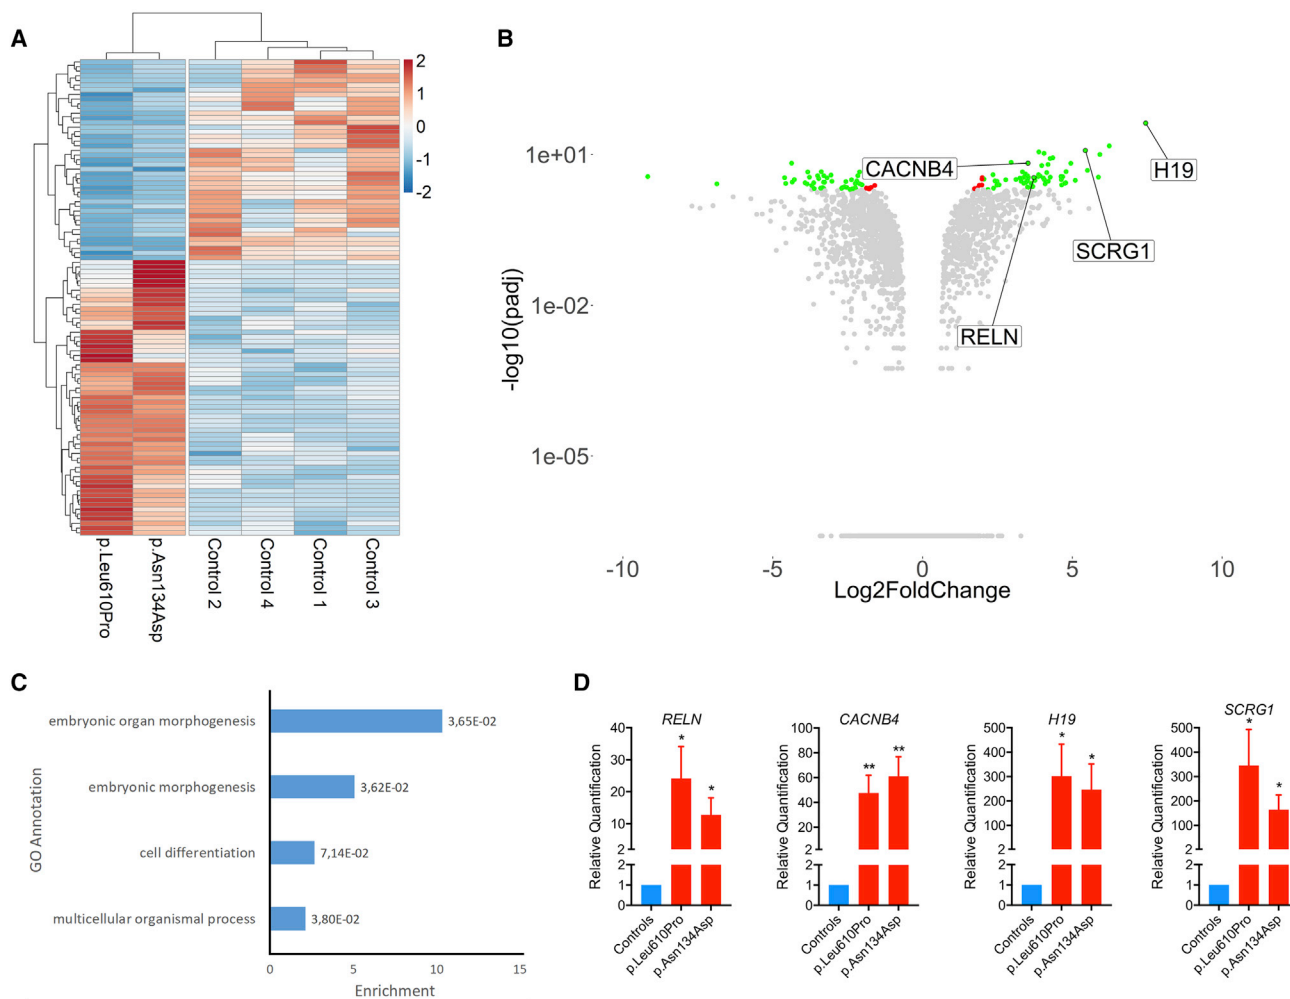

**Figure 4. Fibroblasts Harboring p.Leu610Pro or p.Asn134Asp *SMARCC2* Mutation Have Differential Gene Expression Patterns When Compared to Fibroblasts from Healthy Control Subjects**

RNA-seq was performed on fibroblasts from four healthy controls and two affected individuals to assay gene expression.

(A) Heatmap of differentially expressed genes (DEGs). Log<sub>2</sub> fold change (Log<sub>2</sub>FC) and p values adjusted for 10% false discovery rate (padj) were calculated for the two individuals and four control subjects, respectively pooled together using the “DESeq2” R package. Normalized count values from “DESeq2” were plotted and scaled row-wise using the “pheatmap” R package for genes with a padj lower than 0.01 and an absolute Log<sub>2</sub>FC value higher than 2.

(B) Volcano plot showing differentially regulated genes as fold-change versus adjusted p values. Log<sub>2</sub>FC and  $-\log_{10}(\text{padj})$  values were plotted using the “ggplot2” R package as a volcano plot. Red dots represent genes with a padj lower than 0.01 and a abs(Log<sub>2</sub>FC) lower than 2. Green dots represent genes with a padj lower than 0.01 and a abs(log<sub>2</sub>FC) higher than 2.

(C) Histogram of the enriched GO annotations with FDR adjusted p values lower than 0.01 calculated using the GOrilla web application using DEGs for the two individuals pooled together.

(D) RT-qPCR analysis of mRNA expression profile for *RELN*, *CACNB4*, *H19*, and *SCRG1* with p.Leu610Pro and p.Asn134Asp *SMARCC2* mutations. The data are presented as “relative quantification” mean  $\pm$  SEM from 6 independent control subjects (N = 2). A Student’s t test was used to determine the statistical significance. \*p  $\leq$  0.05 versus control group; \*\*p  $\leq$  0.01 versus control group.

affected isoform.<sup>71</sup> The wide phenotypic variety and the lack of clear genotype-phenotype correlation of the conditions associated with BAF-complex subunits were also suggested to be attributed to a possible dosage-dependent manner of the ATP-dependent chromatin remodeling machinery.<sup>25</sup> This, with the significant intolerance of the BAF-complex subunits genes to LoF variants, might support a contribution of LoF variants to the phenotype.

The *SMARCC2*-related condition presented here overlaps with other BAFopathies suggesting a CSS and Nicolaidese-

Baraitser-like syndrome characterized by intellectual disability, developmental delay with significant speech delay, and behavioral abnormalities. We provide evidence of dysregulated expression of *H19*, *SCRG1*, *RELN*, and *CACNB4*, the relevance of which will need to be explored in future model organism studies.

#### Accession Numbers

Variants have been deposited in ClinVar under submission number SUB4878282.

**Table 2. Summary of Clinical Presentation and Molecular Variants Associated with Coffin-Siris and Coffin-Siris-like Syndromes**

|                                                       | <i>ARID1A</i>                                                                       | <i>ARID1B</i>              | <i>ARID2</i>                                               | <i>SMARCA2</i>             | <i>SMARCA4</i>                                                                      | <i>SMARCB1</i>                                         | <i>SMARCE1</i>                                                                       | <i>SOX11</i>                       | <i>ACTL6A</i>                   | <i>DPF2</i>                              | <i>SMARCC2</i>                                                   |
|-------------------------------------------------------|-------------------------------------------------------------------------------------|----------------------------|------------------------------------------------------------|----------------------------|-------------------------------------------------------------------------------------|--------------------------------------------------------|--------------------------------------------------------------------------------------|------------------------------------|---------------------------------|------------------------------------------|------------------------------------------------------------------|
| Associated condition (MIM#)                           | CSS 2 (614607)                                                                      | CSS 1 (135900)             | CSS 6 (617808)                                             | NCBRS (601358)             | CSS 4 (614609)                                                                      | CSS 3 (614608)                                         | CSS 5 (616938)                                                                       | mental retardation, AD 27 (615866) | ID syndrome                     | CSS 7 (618027)                           | CSS-like                                                         |
| OMIM gene                                             | 603024                                                                              | 614556                     | 609539                                                     | 600014                     | 603254                                                                              | 601607                                                 | 603111                                                                               | 600898                             | 604958                          | 601671                                   | 601734                                                           |
| References                                            | Kosho et al. <sup>4</sup> ; Kosho et al. <sup>66</sup> ; Santen et al. <sup>3</sup> | Santen et al. <sup>3</sup> | Gazdagh et al. <sup>67</sup>                               | Santen et al. <sup>3</sup> | Kosho et al. <sup>4</sup> ; Kosho et al. <sup>66</sup> ; Santen et al. <sup>3</sup> | Kosho et al. <sup>4</sup> ; Kosho et al. <sup>66</sup> | Kosho et al. <sup>4</sup> ; Kosho et al. <sup>66</sup> ; Zarate et al. <sup>68</sup> | Khan et al. <sup>69</sup>          | Marom et al. <sup>23</sup>      | Vasilioi et al. <sup>17</sup>            |                                                                  |
| <b>Pathogenic Variants Reported</b>                   |                                                                                     |                            |                                                            |                            |                                                                                     |                                                        |                                                                                      |                                    |                                 |                                          |                                                                  |
| missense                                              | –                                                                                   | –                          | –                                                          | 4/4                        | 10/12                                                                               | 4/13                                                   | 6/6                                                                                  | 4/13                               | 2/3                             | 5/8                                      | 8/15                                                             |
| in-frame deletion                                     | –                                                                                   | –                          | –                                                          | –                          | 2/12                                                                                | 9/13 (all p.Lys364del)                                 | –                                                                                    | –                                  | –                               | –                                        | 1/15                                                             |
| splice-site variants                                  | –                                                                                   | 2/29                       | –                                                          | –                          | –                                                                                   | –                                                      | –                                                                                    | –                                  | 1/3                             | 1/8                                      | 4/15                                                             |
| frameshift and stop gained/nonsense                   | 8/8                                                                                 | 25/29                      | 11/14                                                      | –                          | –                                                                                   | –                                                      | –                                                                                    | 2/13                               | –                               | 2/8                                      | 2/15                                                             |
| partial/full gene deletions                           | –                                                                                   | 2/29                       | 3/14                                                       | –                          | –                                                                                   | –                                                      | –                                                                                    | 7/13                               | –                               | –                                        | –                                                                |
| <b>Clinical Presentation</b>                          |                                                                                     |                            |                                                            |                            |                                                                                     |                                                        |                                                                                      |                                    |                                 |                                          |                                                                  |
| Short stature                                         | 3/8                                                                                 | 3/27                       | 10/14                                                      | 1/4                        | 9/12                                                                                | 11/11                                                  | 3/5                                                                                  | 4/11                               | 0/3                             | 4/8                                      | 6/13                                                             |
| Poor weight gain                                      | 3/6                                                                                 | 11/28                      | n/r                                                        | 2/4                        | 4/12                                                                                | 8/9                                                    | 4/6                                                                                  | n/r                                | 0/3                             | 4/7                                      | 5/13                                                             |
| Microcephaly                                          | 2/8                                                                                 | 0/27                       | 0/14                                                       | 1/4                        | 10/11                                                                               | 9/10                                                   | 4/6                                                                                  | 3/13                               | n/r                             | 0/7                                      | 6/13                                                             |
| DD and/or ID                                          | 7/7                                                                                 | 28/28                      | 14/14                                                      | 4/4                        | 11/11                                                                               | 11/11                                                  | 6/6                                                                                  | 10/13                              | 3/3                             | 8/8                                      | 15/15                                                            |
| Speech delay (first word after 12 months)             | 6/6                                                                                 | 28/28                      | 11/11                                                      | 4/4                        | 11/11                                                                               | 10/10                                                  | 2/6                                                                                  | 11/13                              | 3/3                             | 8/8                                      | 13/15                                                            |
| Severe speech delay (1st word ≥ 5 years)/no language  | 5/6                                                                                 | 17/28                      | 5/11                                                       | 2/4                        | 6/11                                                                                | 9/10                                                   | n/r                                                                                  | n/r                                | 0/3                             | n/r                                      | 8/15                                                             |
| Seizures                                              | 2/7                                                                                 | 5/20                       | 3/4                                                        | 0/4                        | 2/12                                                                                | 8/10                                                   | 2/6                                                                                  | 4/14                               | 0/3                             | n/r                                      | 4/15                                                             |
| Hypotonia                                             | 7/8                                                                                 | 23/27                      | 2/14                                                       | 2/4                        | 8/11                                                                                | 8/11                                                   | 2/6                                                                                  | 3/13                               | 0/3                             | 4/7                                      | 13/15                                                            |
| Brain MRI abnormalities                               | 7/8                                                                                 | 9/25                       | 6/6                                                        | 0/3                        | 6/7                                                                                 | 9/9                                                    | 3/4                                                                                  | 2/3                                | n/r                             | 3/3                                      | 6/12                                                             |
| Behavioral problems: reported frequency and phenotype | 3/5; AX, HA, OCB                                                                    | n/r                        | 10/14; ADHD, AG, AX, HA, HS (to loud noises), RG, SLD, STM | n/r                        | 7/8; HA, HS, IM, OCB, SAS, SI                                                       | 4/8; HA, IM, SI, TAN                                   | 1/1; HA                                                                              | 6/13; ASD, ADHD, AG, HA, SI, SLD   | 2/3; ADD/ADHD, AG, IM, TAN, SLD | 3/8; STM, TAN, OCB, HA, SLD, RG, DSI/ASD | 10/15; ADHD, AG, ASD, AX, DSI, HA, HP, HS, OCB, RG, SI, SLD, TAN |

(Continued on next page)

**Table 2. Continued**

|                                             | <i>ARID1A</i> | <i>ARID1B</i> | <i>ARID2</i> | <i>SMARCA2</i> | <i>SMARCA4</i> | <i>SMARCB1</i> | <i>SMARCE1</i> | <i>SOX11</i> | <i>ACTL6A</i> | <i>DPF2</i>            | <i>SMARCC2</i> |
|---------------------------------------------|---------------|---------------|--------------|----------------|----------------|----------------|----------------|--------------|---------------|------------------------|----------------|
| <b>Dysmorphic Features</b>                  |               |               |              |                |                |                |                |              |               |                        |                |
| reported as coarse                          | n/r           | n/r           | 9/14         | n/r            | n/r            | n/r            | 6/6            | n/r          | 1/3           | 2/8                    | n/r            |
| thick eyebrows                              | 6/8           | 24/27         | 2/7          | 4/4            | 9/12           | 11/11          | 5/6            | 1/13         | 1/3           | n/r                    | 6/15           |
| thick lower vermillion                      | 6/7           | 22/24         | 1/7          | 2/3            | 10/12          | 8/11           | 6/6            | 7/13         | n/r           | n/r                    | 5/15           |
| hypertrichosis                              | 7/7           | 26/28         | 0/7          | 4/4            | 12/12          | 8/11           | n/r            | 2/13         | n/r           | n/r                    | 6/15           |
| sparse scalp hair                           | 3/5           | 18/28         | 0/7          | 4/4            | 5/12           | 10/11          | 5/6            | 4/13         | n/r           | 6/7                    | 4/15           |
| Cleft palate                                | 2/6           | n/r           | 1/14         | n/r            | 5/12           | 2/13           | 2/6            | 1/13         | 0/3           | n/r                    | 0/15           |
| <b>Hand, Foot &amp; Digital Anomalies</b>   |               |               |              |                |                |                |                |              |               |                        |                |
| hypoplasia or absence of 5th distal phalanx | 6/7           | 5/22          | 2/10         | 0/3            | 10/12          | 8/11           | 2/6            | n/r          | 0/3           | 0/8                    | 0/15           |
| hypoplastic nails                           | 6/8           | 19/28         | 8/12         | 0/2            | 10/12          | 11/11          | 6/6            | 7/14         | 1/3           | 8/8                    | 3/15           |
| brachydactyly                               | 0/8           | 11/24         | 1/10         | 1/3            | n/r            | n/r            | 0/6            | 0/14         | 1/3           | 5/8                    | 0/15           |
| clinodactyly                                | n/r           | n/r           | 0/7          | n/r            | n/r            | n/r            | 0/6            | 12/14        | 2/3           | 3/8                    | 1/15           |
| syndactyly                                  | n/r           | n/r           | 0/7          | n/r            | n/r            | n/r            | 0/6            | 4/14         | 1/3           | n/r                    | 0/15           |
| Other skeletal anomalies                    | 2/7           | n/r           | 4/14         | n/r            | 1/10           | 7/9            | 3/6            | 4/14         | 1/3           | 3/8 (craniosynostosis) | 7/15           |
| Laryngotracheal anomalies                   | 1/4           | 2/28          | 2/14         | n/r            | 2/4            | n/r            | 1/6            | n/r          | 1/3           | n/r                    | 2/15           |
| Hearing loss                                | 2/6           | 5/22          | n/r          | 0/3            | 4/12           | 8/11           | 2/6            | 2/14         | n/r           | 4/8                    | 2/15           |
| Cryptorchidism                              | 2/5           | n/r           | n/r          | n/r            | 3/9            | 2/5            | 1/4            | 3/4          | 0/3           | n/r                    | 2/12           |
| Heart defect                                | 3/8           | n/r           | 1/14         | n/r            | 5/12           | 5/11           | 4/5            | n/r          | 1/3           | 4/8                    | 2/11           |
| Dextrocardia                                | 0/8           | 0/27          | n/r          | 0/4            | 0/12           | 2/11           | 1/5            | n/r          | 0/3           | n/r                    | 0/11           |

Abbreviations: AD, autosomal dominant; ADHD, attention deficit hyperactivity disorder; AG, aggressiveness; ASD, autism spectrum disorder; AX, anxiety; CCS, Coffin-Siris syndrome; DD, developmental delay; DSI, difficulties with social interactions (not qualify for ASD diagnosis); HA, hyperactivity; HP, hyperphagia; HS, hypersensitive; ID, intellectual disability; IM, impulsive; MRI, magnetic resonance imaging; NCBRS, Nicolaides-Baraitser syndrome; n/r, not reported; OCB, obsessive-compulsive behavior; OFC, occipital frontal circumference; RG, rigidity/"routine driven"; SAS, short attention span; SD, standard deviation; SI, self-injury; SLD, sleep disturbance; STM, stereotypic movements; TAN, tantrums. For comparison of clinical presentation of other BAF-related genes (including *PHF6*, *ADNP*, and *TBC1D24*), see Kosho et al.<sup>66</sup>

## Supplemental Data

Supplemental Data include five tables, two figures, and Supplemental Material and Methods and can be found with this article online at <https://doi.org/10.1016/j.ajhg.2018.11.007>.

## Consortia

The members of the Undiagnosed Diseases Network are as follows: David R. Adams, Mercedes E. Alejandro, Patrick Allard, Mahshid S. Azamian, Carlos A. Bacino, Ashok Balasubramanyam, Hayk Barsheghyan, Gabriel F. Batzli, Alan H. Beggs, Babak Behnam, Anna Bican, David P. Bick, Camille L. Birch, Devon Bonner, Braden E. Boone, Bret L. Bostwick, Lauren C. Briere, Donna M. Brown, Matthew Brush, Elizabeth A. Burke, Lindsay C. Burrage, Shan Chen, Gary D. Clark, Terra R. Coakley, Joy D. Cogan, Cynthia M. Cooper, Heidi Cope, William J. Craigen, Precilla D'Souza, Mariska Davids, Jyoti G. Dayal, Esteban C. Dell'Angelica, Shweta U. Dhar, Ani Dillon, Katrina M. Dipple, Laurel A. Donnell-Fink, Naghmeh Dorrani, Daniel C. Dorset, Emilie D. Douine, David D. Draper, David J. Eckstein, Lisa T. Emrick, Christine M. Eng, Ascia Eskin, Cecilia Esteves, Tyra Estwick, Carlos Ferreira, Brent L. Fogel, Noah D. Friedman, William A. Gahl, Emily Glanton, Rena A. Godfrey, David B. Goldstein, Sarah E. Gould, Jean-Philippe F. Gourdin, Catherine A. Groden, Andrea L. Gropman, Melissa Haendel, Rizwan Hamid, Neil A. Hanchard, Lori H. Handley, Matthew R. Herzog, Ingrid A. Holm, Jason Hom, Ellen M. Howerton, Yong Huang, Howard J. Jacob, Mahim Jain, Yong-hui Jiang, Jean M. Johnston, Angela L. Jones, Isaac S. Kohane, Donna M. Krasnewich, Elizabeth L. Krieg, Joel B. Krier, Seema R. Lalani, C. Christopher Lau, Jozef Lazar, Brendan H. Lee, Hane Lee, Shawn E. Levy, Richard A. Lewis, Sharyn A. Lincoln, Allen Lipson, Sandra K. Loo, Joseph Loscalzo, Richard L. Maas, Ellen F. Macnamara, Calum A. MacRae, Valerie V. Maduro, Marta M. Majcherska, May Christine V. Malicdan, Laura A. Mamounas, Teri A. Manolio, Thomas C. Markello, Ronit Marom, Julian A. Martinez-Agosto, Shruti Marwaha, Thomas May, Allyn McConkie-Rosell, Colleen E. McCormack, Alexa T. McCray, Matthew Might, Paolo M. Moretti, Marie Morimoto, John J. Mulvihill, Jennifer L. Murphy, Donna M. Muzny, Michele E. Nehrebecky, Stan F. Nelson, J. Scott Newberry, John H. Newman, Sarah K. Nicholas, Donna Novacic, Jordan S. Orange, J. Carl Pallais, Christina G.S. Palmer, Jeanette C. Papp, Neil H. Parker, Loren D.M. Pena, John A. Phillips III, Jennifer E. Posey, John H. Postlethwait, Lorraine Potocki, Barbara N. Pusey, Chloe M. Reuter, Amy K. Robertson, Lance H. Rodan, Jill A. Rosenfeld, Jacynda B. Sampson, Susan L. Samson, Kelly Schoch, Molly C. Schroeder, Daryl A. Scott, Prashant Sharma, Vandana Shashi, Rebecca Signer, Edwin K. Silverman, Janet S. Sinsheimer, Kevin S. Smith, Rebecca C. Spillmann, Kimberly Splinter, Joan M. Stoler, Nicholas Stong, Jennifer A. Sullivan, David A. Sweetser, Cynthia J. Tifft, Camilo Toro, Alyssa A. Tran, Tiina K. Urv, Zaheer M. Valivullah, Eric Vilain, Tiphonie P. Vogel, Colleen E. Wahl, Nicole M. Walley, Chris A. Walsh, Patricia A. Ward, Katrina M. Waters, Monte Westerfield, Anastasia L. Wise, Lynne A. Wolfe, Elizabeth A. Worthy, Shinya Yamamoto, Yaping Yang, Guoyun Yu, Diane B. Zastrow, and Allison Zheng.

## Acknowledgments

We thank the affected individuals and their families for their participation in this study. We thank Xinyu Cao from Duke for technical support for the mRNA expression analysis. We thank

the CIHR and Fonds de recherche du Québec – Santé (FRQS), Canada for clinician-scientist awards to P.M.C. Spanish individuals' study was supported by grant PI14/00350 (Instituto de Salud Carlos III -Acción Estratégica en Salud 2013–2016; FEDER -Fondo Europeo de Desarrollo Regional). Individual 10 was evaluated through the Duke Genome Sequencing Clinic, supported by the Duke University Health system, and partially funded by UCB Celltech. Partial research reported in this manuscript was supported by the NIH Common Fund, through the Office of Strategic Coordination/Office of the NIH Director under award numbers U01HG007672 (Duke University) and U01HG007942 (Baylor College of Medicine-Sequencing). The content is solely the responsibility of the authors and does not necessarily represent the official views of the National Institutes of Health.

## Declaration of Interests

The Department of Molecular and Human Genetics at Baylor College of Medicine receives revenue from clinical genetic testing performed at Baylor Genetics. Megan Cho and Heather McLaughlin are employees of GeneDx, Inc., a wholly owned subsidiary of OPKO Health, Inc. All other authors declare no competing interests.

Received: June 15, 2018

Accepted: November 14, 2018

Published: December 20, 2018

## Web Resources

ClinVar, <https://www.ncbi.nlm.nih.gov/clinvar/>  
ExAC Browser, <http://exac.broadinstitute.org/>  
GeneBank, <https://www.ncbi.nlm.nih.gov/genbank/>  
GeneMatcher, <https://www.genematcher.org/>  
Genetic Intolerance, <http://genic-intolerance.org/>  
Genome Browser, <https://genome.ucsc.edu/>  
GnomAD Browser, <http://gnomad.broadinstitute.org/>  
Human Phenotype Ontology (HPO), <http://human-phenotype-ontology.org/>  
Human Splicing Finder, <http://www.umd.be/HSF3/>  
Missense Tolerance Ratio (MTR) Tool, <http://mtr-viewer.mdhs.unimelb.edu.au/mtr-viewer/>  
OMIM, <https://www.omim.org/>  
PolyPhen-2, <http://genetics.bwh.harvard.edu/pph2>  
PROVEAN, <http://provean.jcvi.org/>  
SIFT, <http://sift.bii.a-star.edu.sg/>

## References

1. Barutcu, A.R., Lajoie, B.R., Fritz, A.J., McCord, R.P., Nickerson, J.A., van Wijnen, A.J., Lian, J.B., Stein, J.L., Dekker, J., Stein, G.S., and Imbalzano, A.N. (2016). SMARCA4 regulates gene expression and higher-order chromatin structure in proliferating mammary epithelial cells. *Genome Res.* 26, 1188–1201.
2. Ronan, J.L., Wu, W., and Crabtree, G.R. (2013). From neural development to cognition: unexpected roles for chromatin. *Nat. Rev. Genet.* 14, 347–359.
3. Santen, G.W., Aten, E., Vulto-van Silfhout, A.T., Pottinger, C., van Bon, B.W., van Minderhout, I.J., Snowdowne, R., van der Lans, C.A., Boogaard, M., Linssen, M.M., et al.; Coffin-Siris consortium (2013). Coffin-Siris syndrome and the BAF



- complex: genotype-phenotype study in 63 patients. *Hum. Mutat.* **34**, 1519–1528.
4. Kosho, T., Okamoto, N.; and Coffin-Siris Syndrome International Collaborators (2014). Genotype-phenotype correlation of Coffin-Siris syndrome caused by mutations in SMARCB1, SMARCA4, SMARCE1, and ARID1A. *Am. J. Med. Genet. C. Semin. Med. Genet.* **166C**, 262–275.
  5. Sousa, S.B., Hennekam, R.C.; and Nicolaides-Baraitser Syndrome International Consortium (2014). Phenotype and genotype in Nicolaides-Baraitser syndrome. *Am. J. Med. Genet. C. Semin. Med. Genet.* **166C**, 302–314.
  6. Hoyer, J., Ekici, A.B., Ende, S., Popp, B., Zweier, C., Wiesener, A., Wohlleber, E., Dufke, A., Rossier, E., Petsch, C., et al. (2012). Haploinsufficiency of ARID1B, a member of the SWI/SNF-a chromatin-remodeling complex, is a frequent cause of intellectual disability. *Am. J. Hum. Genet.* **90**, 565–572.
  7. Halgren, C., Kjaergaard, S., Bak, M., Hansen, C., El-Schich, Z., Anderson, C.M., Henriksen, K.F., Hjalgrim, H., Kirchoff, M., Bijlsma, E.K., et al. (2012). Corpus callosum abnormalities, intellectual disability, speech impairment, and autism in patients with haploinsufficiency of ARID1B. *Clin. Genet.* **82**, 248–255.
  8. Van Houdt, J.K., Nowakowska, B.A., Sousa, S.B., van Schaik, B.D., Seuntjens, E., Avonce, N., Sifrim, A., Abdul-Rahman, O.A., van den Boogaard, M.J., Bottani, A., et al. (2012). Heterozygous missense mutations in SMARCA2 cause Nicolaides-Baraitser syndrome. *Nat. Genet.* **44**, 445–449, S441.
  9. Vandeweyer, G., Helmsmoortel, C., Van Dijck, A., Vulto-van Silfhout, A.T., Coe, B.P., Bernier, R., Gerds, J., Rooms, L., van den Ende, J., Bakshi, M., et al. (2014). The transcriptional regulator ADNP links the BAF (SWI/SNF) complexes with autism. *Am. J. Med. Genet. C. Semin. Med. Genet.* **166C**, 315–326.
  10. Santen, G.W., Kriek, M., and van Attikum, H. (2012). SWI/SNF complex in disorder: SWItching from malignancies to intellectual disability. *Epigenetics* **7**, 1219–1224.
  11. Neale, B.M., Kou, Y., Liu, L., Ma'ayan, A., Samocha, K.E., Sabo, A., Lin, C.F., Stevens, C., Wang, L.S., Makarov, V., et al. (2012). Patterns and rates of exonic de novo mutations in autism spectrum disorders. *Nature* **485**, 242–245.
  12. Loe-Mie, Y., Lepagnol-Bestel, A.M., Maussion, G., Doron-Faigenboim, A., Imbeaud, S., Delacroix, H., Aggerbeck, L., Pupko, T., Gorwood, P., Simonneau, M., and Moalic, J.M. (2010). SMARCA2 and other genome-wide supported schizophrenia-associated genes: regulation by REST/NRSF, network organization and primate-specific evolution. *Hum. Mol. Genet.* **19**, 2841–2857.
  13. Chesi, A., Staahl, B.T., Jovičić, A., Couthouis, J., Fasolino, M., Raphael, A.R., Yamazaki, T., Elias, L., Polak, M., Kelly, C., et al. (2013). Exome sequencing to identify de novo mutations in sporadic ALS trios. *Nat. Neurosci.* **16**, 851–855.
  14. Schrier, S.A., Bodurtha, J.N., Burton, B., Chudley, A.E., Chiong, M.A., D'Avanzo, M.G., Lynch, S.A., Musio, A., Nyzov, D.M., Sanchez-Lara, P.A., et al. (2012). The Coffin-Siris syndrome: a proposed diagnostic approach and assessment of 15 overlapping cases. *Am. J. Med. Genet. A.* **158A**, 1865–1876.
  15. Tsurusaki, Y., Okamoto, N., Ohashi, H., Kosho, T., Imai, Y., Hibi-Ko, Y., Kaname, T., Naritomi, K., Kawame, H., Wakui, K., et al. (2012). Mutations affecting components of the SWI/SNF complex cause Coffin-Siris syndrome. *Nat. Genet.* **44**, 376–378.
  16. Bramswig, N.C., Caluseriu, O., Lüdecke, H.J., Bolduc, F.V., Noel, N.C., Wieland, T., Surowy, H.M., Christen, H.J., Engels, H., Strom, T.M., and Wiczorek, D. (2017). Heterozygosity for ARID2 loss-of-function mutations in individuals with a Coffin-Siris syndrome-like phenotype. *Hum. Genet.* **136**, 297–305.
  17. Vasileiou, G., Vergarajauregui, S., Ende, S., Popp, B., Büttner, C., Ekici, A.B., Gerard, M., Bramswig, N.C., Albrecht, B., Clayton-Smith, J., et al.; Deciphering Developmental Disorders Study (2018). Mutations in the BAF-complex subunit DPF2 are associated with Coffin-Siris syndrome. *Am. J. Hum. Genet.* **102**, 468–479.
  18. Hempel, A., Pagnamenta, A.T., Blyth, M., Mansour, S., McConnell, V., Kou, I., Ikegawa, S., Tsurusaki, Y., Matsumoto, N., Lo-Castro, A., et al.; DDD Collaboration (2016). Deletions and de novo mutations of SOX11 are associated with a neurodevelopmental disorder with features of Coffin-Siris syndrome. *J. Med. Genet.* **53**, 152–162.
  19. Zweier, C., Rittinger, O., Bader, I., Berland, S., Cole, T., Degenhardt, F., Di Donato, N., Graul-Neumann, L., Hoyer, J., Lynch, S.A., et al. (2014). Females with de novo aberrations in PHF6: clinical overlap of Borjeson-Forssman-Lehmann with Coffin-Siris syndrome. *Am. J. Med. Genet. C. Semin. Med. Genet.* **166C**, 290–301.
  20. Nicolaides, P., and Baraitser, M. (1993). An unusual syndrome with mental retardation and sparse hair. *Clin. Dysmorphol.* **2**, 232–236.
  21. Pretegianni, E., Mari, F., Renieri, A., Penco, S., and Dotti, M.T. (2016). Nicolaides-Baraitser syndrome: defining a phenotype. *J. Neurol.* **263**, 1659–1660.
  22. Campeau, P.M., Hennekam, R.C.; and DOORS syndrome collaborative group (2014). DOORS syndrome: phenotype, genotype and comparison with Coffin-Siris syndrome. *Am. J. Med. Genet. C. Semin. Med. Genet.* **166C**, 327–332.
  23. Marom, R., Jain, M., Burrage, L.C., Song, I.W., Graham, B.H., Brown, C.W., Stevens, S.J.C., Stegmann, A.P.A., Gunter, A.T., Kaplan, J.D., et al. (2017). Heterozygous variants in ACTL6A, encoding a component of the BAF complex, are associated with intellectual disability. *Hum. Mutat.* **38**, 1365–1371.
  24. Helmsmoortel, C., Vulto-van Silfhout, A.T., Coe, B.P., Vandeweyer, G., Rooms, L., van den Ende, J., Schuurs-Hoeijmakers, J.H., Marcelis, C.L., Willemsen, M.H., Vissers, L.E., et al. (2014). A SWI/SNF-related autism syndrome caused by de novo mutations in ADNP. *Nat. Genet.* **46**, 380–384.
  25. Bögershausen, N., and Wollnik, B. (2018). Mutational landscapes and phenotypic spectrum of SWI/SNF-related intellectual disability disorders. *Front. Mol. Neurosci.* **11**, 252.
  26. Ring, H.Z., Vameghi-Meyers, V., Wang, W., Crabtree, G.R., and Francke, U. (1998). Five SWI/SNF-related, matrix-associated, actin-dependent regulator of chromatin (SMAR) genes are dispersed in the human genome. *Genomics* **51**, 140–143.
  27. Tuoc, T.C., Boretius, S., Sansom, S.N., Pitulescu, M.E., Frahm, J., Livesey, F.J., and Stoykova, A. (2013). Chromatin regulation by BAF170 controls cerebral cortical size and thickness. *Dev. Cell* **25**, 256–269.
  28. Narayanan, R., Pirouz, M., Kerimoglu, C., Pham, L., Wagener, R.J., Kiszka, K.A., Rosenbusch, J., Seong, R.H., Kessel, M., Fischer, A., et al. (2015). Loss of BAF (mSWI/SNF) complexes causes global transcriptional and chromatin state changes in forebrain development. *Cell Rep.* **13**, 1842–1854.
  29. Tuoc, T., Dere, E., Radyushkin, K., Pham, L., Nguyen, H., Tonchev, A.B., Sun, G., Ronnenberg, A., Shi, Y., Staiger, J.F., et al.

- (2017). Ablation of BAF170 in developing and postnatal dentate gyrus affects neural stem cell proliferation, differentiation, and learning. *Mol. Neurobiol.* *54*, 4618–4635.
30. Ben-David, E., and Shifman, S. (2013). Combined analysis of exome sequencing points toward a major role for transcription regulation during brain development in autism. *Mol. Psychiatry* *18*, 1054–1056.
  31. Sobreira, N., Schiettecatte, F., Valle, D., and Hamosh, A. (2015). GeneMatcher: a matching tool for connecting investigators with an interest in the same gene. *Hum. Mutat.* *36*, 928–930.
  32. Martínez, F., Caro-Llopis, A., Roselló, M., Oltra, S., Mayo, S., Monfort, S., and Orellana, C. (2017). High diagnostic yield of syndromic intellectual disability by targeted next-generation sequencing. *J. Med. Genet.* *54*, 87–92.
  33. Zhu, X., Petrovski, S., Xie, P., Ruzzo, E.K., Lu, Y.F., McSweeney, K.M., Ben-Zeev, B., Nissenkorn, A., Anikster, Y., Oz-Levi, D., et al. (2015). Whole-exome sequencing in undiagnosed genetic diseases: interpreting 119 trios. *Genet. Med.* *17*, 774–781.
  34. Quinodoz, M., Royer-Bertrand, B., Cisarova, K., Di Gioia, S.A., Superti-Furga, A., and Rivolta, C. (2017). DOMINO: using machine learning to predict genes associated with dominant disorders. *Am. J. Hum. Genet.* *101*, 623–629.
  35. Lek, M., Karczewski, K.J., Minikel, E.V., Samocha, K.E., Banks, E., Fennell, T., O'Donnell-Luria, A.H., Ware, J.S., Hill, A.J., Cummings, B.B., et al.; Exome Aggregation Consortium (2016). Analysis of protein-coding genetic variation in 60,706 humans. *Nature* *536*, 285–291.
  36. Petrovski, S., Gussow, A.B., Wang, Q., Halvorsen, M., Han, Y., Weir, W.H., Allen, A.S., and Goldstein, D.B. (2015). The intolerance of regulatory sequence to genetic variation predicts gene dosage sensitivity. *PLoS Genet.* *11*, e1005492.
  37. Huang, N., Lee, I., Marcotte, E.M., and Hurler, M.E. (2010). Characterising and predicting haploinsufficiency in the human genome. *PLoS Genet.* *6*, e1001154.
  38. Aravind, L., and Iyer, L.M. (2002). The SWIRM domain: a conserved module found in chromosomal proteins points to novel chromatin-modifying activities. *Genome Biol* *3*, RESEARCH0039.
  39. Yoneyama, M., Tochio, N., Umehara, T., Koshiha, S., Inoue, M., Yabuki, T., Aoki, M., Seki, E., Matsuda, T., Watanabe, S., et al. (2007). Structural and functional differences of SWIRM domain subtypes. *J. Mol. Biol.* *369*, 222–238.
  40. Boyer, L.A., Latek, R.R., and Peterson, C.L. (2004). The SANT domain: a unique histone-tail-binding module? *Nat. Rev. Mol. Cell Biol.* *5*, 158–163.
  41. Lelieveld, S.H., Wiel, L., Venselaar, H., Pfundt, R., Vriend, G., Veltman, J.A., Brunner, H.G., Vissers, L.E.L.M., and Gilissen, C. (2017). Spatial clustering of de novo missense mutations identifies candidate neurodevelopmental disorder-associated genes. *Am. J. Hum. Genet.* *101*, 478–484.
  42. Gabory, A., Jammes, H., and Dandolo, L. (2010). The H19 locus: role of an imprinted non-coding RNA in growth and development. *BioEssays* *32*, 473–480.
  43. Raveh, E., Matouk, I.J., Gilon, M., and Hochberg, A. (2015). The H19 Long non-coding RNA in cancer initiation, progression and metastasis - a proposed unifying theory. *Mol. Cancer* *14*, 184.
  44. Han, C.L., Ge, M., Liu, Y.P., Zhao, X.M., Wang, K.L., Chen, N., Meng, W.J., Hu, W., Zhang, J.G., Li, L., and Meng, F.G. (2018). LncRNA H19 contributes to hippocampal glial cell activation via JAK/STAT signaling in a rat model of temporal lobe epilepsy. *J. Neuroinflammation* *15*, 103.
  45. Dron, M., Dandoy-Dron, F., Guillo, F., Benboudjema, L., Hauw, J.J., Lebon, P., Dormont, D., and Tovey, M.G. (1998). Characterization of the human analogue of a Scrapie-responsive gene. *J. Biol. Chem.* *273*, 18015–18018.
  46. Kashevarova, A.A., Nazarenko, L.P., Skryabin, N.A., Salyukova, O.A., Chechetkina, N.N., Tolmacheva, E.N., Sazhenova, E.A., Magini, P., Graziano, C., Romeo, G., et al. (2014). Array CGH analysis of a cohort of Russian patients with intellectual disability. *Gene* *536*, 145–150.
  47. Aomatsu, E., Takahashi, N., Sawada, S., Okubo, N., Hasegawa, T., Taira, M., Miura, H., Ishisaki, A., and Chosa, N. (2014). Novel SCRG1/BST1 axis regulates self-renewal, migration, and osteogenic differentiation potential in mesenchymal stem cells. *Sci. Rep.* *4*, 3652.
  48. Ninkovic, J., Steiner-Mezzadri, A., Jawerka, M., Akinci, U., Masserdotti, G., Petricca, S., Fischer, J., von Holst, A., Beckers, J., Lie, C.D., et al. (2013). The BAF complex interacts with Pax6 in adult neural progenitors to establish a neurogenic cross-regulatory transcriptional network. *Cell Stem Cell* *13*, 403–418.
  49. Wasser, C.R., and Herz, J. (2017). Reelin: neurodevelopmental architect and homeostatic regulator of excitatory synapses. *J. Biol. Chem.* *292*, 1330–1338.
  50. Mochida, S. (2018). Presynaptic calcium channels. *Neurosci. Res.* *127*, 33–44.
  51. Greer, P.L., and Greenberg, M.E. (2008). From synapse to nucleus: calcium-dependent gene transcription in the control of synapse development and function. *Neuron* *59*, 846–860.
  52. Ronjat, M., Kiyonaka, S., Barbado, M., De Waard, M., and Mori, Y. (2013). Nuclear life of the voltage-gated Cacnb4 subunit and its role in gene transcription regulation. *Channels (Austin)* *7*, 119–125.
  53. Rima, M., Daghsmi, M., Lopez, A., Fajloun, Z., Lefrancois, L., Dunach, M., Mori, Y., Merle, P., Brusés, J.L., De Waard, M., and Ronjat, M. (2017). Down-regulation of the Wnt/ $\beta$ -catenin signaling pathway by Cacnb4. *Mol. Biol. Cell* *28*, 3699–3708.
  54. Tadmouri, A., Kiyonaka, S., Barbado, M., Rousset, M., Fablet, K., Sawamura, S., Bahembera, E., Pernet-Gallay, K., Arnoult, C., Miki, T., et al. (2012). Cacnb4 directly couples electrical activity to gene expression, a process defective in juvenile epilepsy. *EMBO J.* *31*, 3730–3744.
  55. Mulligan, K.A., and Cheyette, B.N. (2012). Wnt signaling in vertebrate neural development and function. *J. Neuroimmune Pharmacol.* *7*, 774–787.
  56. Pinggera, A., and Striessnig, J. (2016). Ca<sub>v</sub> 1.3 (CACNA1D) L-type Ca<sup>2+</sup> channel dysfunction in CNS disorders. *J. Physiol.* *594*, 5839–5849.
  57. Zamponi, G.W. (2016). Targeting voltage-gated calcium channels in neurological and psychiatric diseases. *Nat. Rev. Drug Discov.* *15*, 19–34.
  58. Breitenkamp, A.F., Matthes, J., and Herzog, S. (2015). Voltage-gated calcium channels and autism spectrum disorders. *Curr. Mol. Pharmacol.* *8*, 123–132.
  59. Soldatov, N.M. (2015). CACNB2: an emerging pharmacological target for hypertension, heart failure, arrhythmia and mental disorders. *Curr. Mol. Pharmacol.* *8*, 32–42.
  60. Wang, X., Lee, R.S., Alver, B.H., Haswell, J.R., Wang, S., Mieczkowski, J., Drier, Y., Gillespie, S.M., Archer, T.C., Wu, J.N., et al. (2017). SMARCB1-mediated SWI/SNF complex function is essential for enhancer regulation. *Nat. Genet.* *49*, 289–295.

61. Raab, J.R., Runge, J.S., Spear, C.C., and Magnuson, T. (2017). Co-regulation of transcription by BRG1 and BRM, two mutually exclusive SWI/SNF ATPase subunits. *Epigenetics Chromatin* 10, 62.
62. Hodges, H.C., Stanton, B.Z., Cermakova, K., Chang, C.Y., Miller, E.L., Kirkland, J.G., Ku, W.L., Veverka, V., Zhao, K., and Crabtree, G.R. (2018). Dominant-negative SMARCA4 mutants alter the accessibility landscape of tissue-unrestricted enhancers. *Nat. Struct. Mol. Biol.* 25, 61–72.
63. Nguyen, H., Kerimoglu, C., Pirouz, M., Pham, L., Kiszka, K.A., Sokpor, G., Sakib, M.S., Rosenbusch, J., Teichmann, U., Seong, R.H., et al. (2018). Epigenetic regulation by BAF complexes limits neural stem cell proliferation by suppressing Wnt signaling in late embryonic development. *Stem Cell Reports* 10, 1734–1750.
64. Sokpor, G., Xie, Y., Rosenbusch, J., and Tuoc, T. (2017). Chromatin remodeling BAF (SWI/SNF) complexes in neural development and disorders. *Front. Mol. Neurosci.* 10, 243.
65. Son, E.Y., and Crabtree, G.R. (2014). The role of BAF (mSWI/SNF) complexes in mammalian neural development. *Am. J. Med. Genet. C. Semin. Med. Genet.* 166C, 333–349.
66. Kosho, T., Miyake, N., and Carey, J.C. (2014). Coffin-Siris syndrome and related disorders involving components of the BAF (mSWI/SNF) complex: historical review and recent advances using next generation sequencing. *Am. J. Med. Genet. C. Semin. Med. Genet.* 166C, 241–251.
67. Gazdagh, G., Blyth, M., Scurr, I., Turnpenny, P.D., Mehta, S.G., Armstrong, R., McEntagart, M., Newbury-Ecob, R., Tobias, E.S., Study, D.D.D., et al. (2018). Extending the clinical and genetic spectrum of ARID2 related intellectual disability. A case series of 7 patients. *Eur. J. Med. Genet.* Published online April 23, 2018. pii: S1769-7212(18)30016-8.
68. Zarate, Y.A., Bhoj, E., Kaylor, J., Li, D., Tsurusaki, Y., Miyake, N., Matsumoto, N., Phadke, S., Escobar, L., Irani, A., et al. (2016). SMARCE1, a rare cause of Coffin-Siris Syndrome: Clinical description of three additional cases. *Am. J. Med. Genet. A.* 170, 1967–1973.
69. Khan, U., DDD Study, Baker, E., and Clayton-Smith, J. (2018). Observation of cleft palate in an individual with SOX11 mutation: indication of a role for SOX11 in human palatogenesis. *Cleft Palate Craniofac. J.* 55, 456–461.
70. Wang, W., Xue, Y., Zhou, S., Kuo, A., Cairns, B.R., and Crabtree, G.R. (1996). Diversity and specialization of mammalian SWI/SNF complexes. *Genes Dev.* 10, 2117–2130.
71. Kazantseva, A., Sepp, M., Kazantseva, J., Sadam, H., Pruunsild, P., Timmusk, T., Neuman, T., and Palm, K. (2009). N-terminally truncated BAF57 isoforms contribute to the diversity of SWI/SNF complexes in neurons. *J. Neurochem.* 109, 807–818.

## Supplemental Data

### Expanding the Spectrum of BAF-Related Disorders:

#### *De Novo* Variants in *SMARCC2* Cause a Syndrome

#### with Intellectual Disability and Developmental Delay

Keren Machol, Justine Rousseau, Sophie Ehresmann, Thomas Garcia, Thi Tuyet Mai Nguyen, Rebecca C. Spillmann, Jennifer A. Sullivan, Vandana Shashi, Yong-hui Jiang, Nicholas Stong, Elise Fiala, Marcia Willing, Rolph Pfundt, Tjitske Kleefstra, Megan T. Cho, Heather McLaughlin, Monica Rosello Piera, Carmen Orellana, Francisco Martínez, Alfonso Caro-Llopis, Sandra Monfort, Tony Roscioli, Cheng Yee Nixon, Michael F. Buckley, Anne Turner, Wendy D. Jones, Peter M. van Hasselt, Floris C. Hofstede, Koen L.I. van Gassen, Alice S. Brooks, Marjon A. van Slegtenhorst, Katherine Lachlan, Jessica Sebastian, Suneeta Madan-Khetarpal, Desai Sonal, Naidu Sakkubai, Julien Thevenon, Laurence Faivre, Alice Maurel, Slavé Petrovski, Ian D. Krantz, Jennifer M. Tarpinian, Jill A. Rosenfeld, Brendan H. Lee, Undiagnosed Diseases Network, and Philippe M. Campeau



## Supplemental Data

### Supplemental Figures

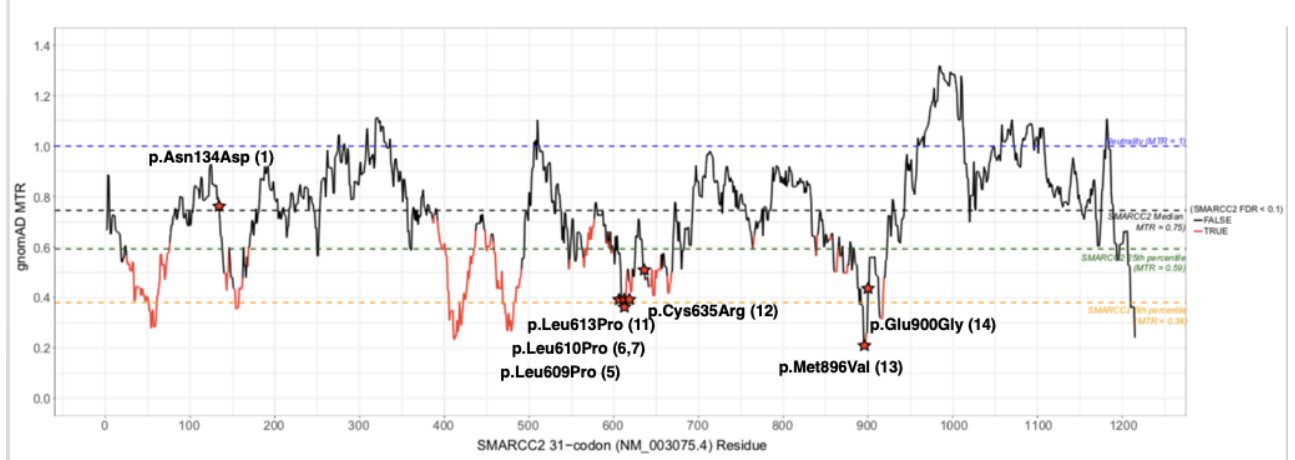

**Figure S1: Visualization of the eight *de novo* missense variants in *SMARCC2* using the Missense Tolerance Ratio (MTR) tool.** Eight of the individuals in this cohort harbor one of seven *de novo* missense variants. Six of these missense variants preferentially affect one of the 25% most intolerant residues of *SMARCC2* ( $p=0.0004$ ). p.Asn134Asp is the only missense variant affecting a tolerant region of this gene. Numbers in brackets represent individual's number.

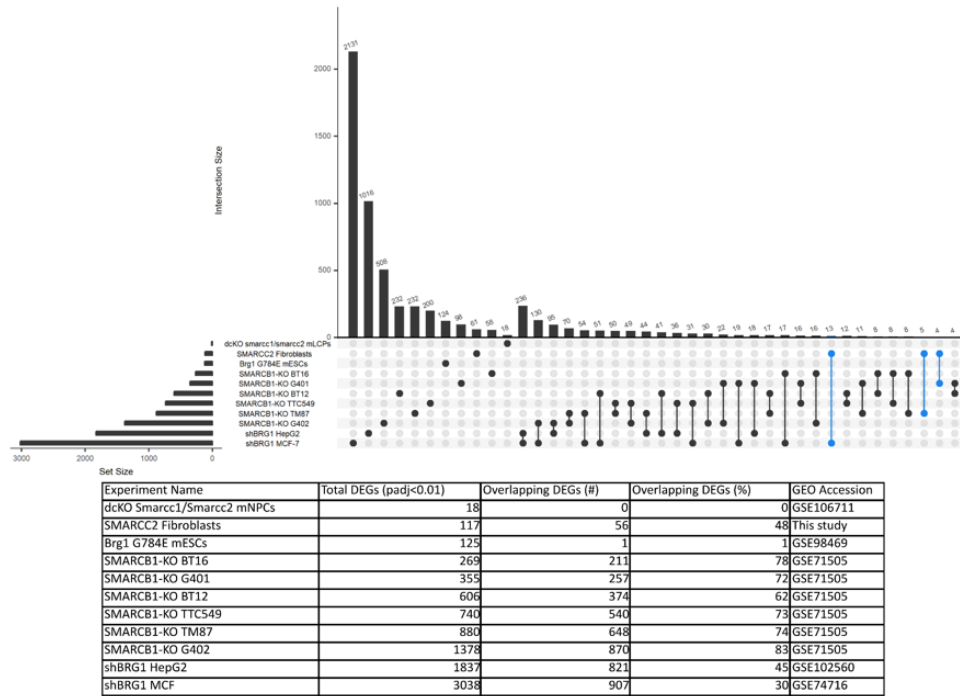

**Figure S2: Comparison of RNAseq data from various public datasets involving BAF-complex components.** RNAseq results were obtained from the European Nucleotide Archive. Datasets were analyzed with a padj cutoff of 0.01 as some datasets did not have DEGs whose Log2FC was higher than 2. DEGs shared by at least 2 datasets were considered as overlapping. To compare DEGs between species, gene names were converted from mouse to human, then plotted using the UpSet R package (Conway J.R, 2017). Overlaps which contain genes found in *SMARCC2* Fibroblasts are colored in blue.

### Supplemental Tables

**Table S1: Elaborated table describing the clinical findings in 15 individuals harboring *SMARCC2* variants.**

ADHD- attention deficit hyperactivity disorder; AG-aggressiveness; ASD- autism spectrum disorder; AX- anxiety; CNS – central nervous system; DD- developmental delay; DQ- developmental quotient; DSI- difficulties with social interactions (not qualify for ASD diagnosis); F-female; FTT – failure to thrive; HA- hyperactive; HP- hyperphagia; HS- hypersensitive; ID- intellectual disability; L – left; M- male; Mo- months; MRI- magnetic resonance imaging; n/a- not available information; n/ap- not applicable; n/r- not reported; OB- obsession; OFC- occipital frontal circumference; R- right; RG- rigidity/‘routine driven’; SD- standard deviation; SI- self-injury; SLD- sleep disturbance; ST- stubborn; TAN- tantrums; Y- years;

**Table S2: Differentially expressed genes in individuals 1 and 7 with *SMARCC2* variants p.Asn134Asp and p.Leu610Pro compared to control samples.** Significant differentially expressed genes were selected with  $\log_2$  fold change of more than 2 or less than -2, and an adjusted p-value lower than 0.01. Due to sex differences between patients (males) and controls (females), genes on the X or Y chromosomes are not included.

**Table S3: Differentially expressed genes in individual 1 with *SMARCC2* variant p.Asn134Asp compared to control samples.** Significant differentially expressed genes were selected with  $\log_2$  fold change of more than 2 or less than -2, and an adjusted p-value lower than 0.01. Due to sex differences between patients (males) and controls (females), genes on the X or Y chromosomes are not included.

**Table S4: Differentially expressed genes in individual 7 with *SMARCC2* variant p.Leu610Pro compared to control samples.** Significant differentially expressed genes were selected with  $\log_2$  fold change of more than 2 or less than -2, and an adjusted p-value lower than 0.01. Due to sex differences between patients (males) and controls (females), genes on the X or Y chromosomes are not included.

**Table S5: GOrilla annotation for differentially expressed genes in patients with *SMARCC2* variants p.Leu610Pro or p.Asn134Asp compared to control samples.** Significant differentially expressed genes were selected with absolute  $\text{Log}_2\text{FC}$  higher than 2, and an adjusted p-value lower than 0.01. N is the total number of background genes, B is the total number of genes in the background list which correspond to the specific GO, n is the total number of genes with a differential expression in both the patients, and b is the number of genes in that target list with this GO annotation.

## **Supplemental Methods**

### **Document S1: Materials and Methods**

#### **RT-qPCR for gene expression analysis:**

Total RNA was isolated from fibroblasts using Qiagen RNeasy mini kit (Qiagen cat# 74104) and treated with DNase (Turbo DNA Free, ThermoFisher cat # AM1907) before the cDNA synthesis. cDNA was prepared from 2ug of total RNA using Superscript III Reverse Transcriptase and oligo(dT) primer (ThermoFisher). cDNA was quantified by using SsoAdvanced Universal SYBR



Green (Bio-rad) on a LightCycler 480 II (Roche) with a 10s denaturing step at 95°C and 20s annealing step at 59°C for 40 cycles.

**Splicing PCR:** The following primers generated from mRNA of SMACCR2 (NM\_003075) were used. SMARCC2-F2 GGC TGC GCA CAG AC A TGT ACA CAA;

SMARCC2-R2 TAA CAG GGT TGC CCG ACT GAC TGA;

SMARCC2-R3 TCC GCC TTG CCT GTT ACT TTG GCT;

The PCR cycling condition for PCR is as following: 95°C 60seconds for denature, 60°C 30 second annealing, and 72°C

The PCR products were recovered from agarose gel and then sequenced.

**Splicing RT-qPCR:** Total RNA was isolated from LCLs using Qiagen RNeasy mini kit, and treated with DNase using the Turbo DNA Free kit. cDNA was prepared from 1 ug RNA using qScript cDNA SuperMix (VWR International cat # CA101414-104). cDNA was quantified by using PowerUp SYBR Green Master Mix (ThermoFisher cat# A25742) on a LightCycler 96 (Roche).

### **RNAseq Analysis**

Human primary fibroblasts were sub-cultured in DMEM (ThermoFisher cat# 11995-065) 10% FBS, 1mM GlutaMax (ThermoFisher cat#35050-061) and 1X antibiotics-antimycotics (ThermoFisher cat# 15240-062). Fibroblasts were plated at 1 million cells per 150 mm dish and allowed to grow until they reached about 80% confluency. Cells were trypsinized, washed 2 times with 1X PBS, resuspended in QIAzol (Qiagen cat# 79306) and stored at -80°C until all samples were ready for RNA extraction. RNA isolation was performed using the RNeasy

mini kit (Qiagen cat# 74104) according to the manufacturer's protocol. Samples were treated with the Turbo DNA free kit (ThermoFisher cat# AM1907) and quality was assessed using the Agilent 2100 Bioanalyzer. Sequencing was performed at the McGill University and Genome Quebec Innovation Center (MUGQIC). mRNA Libraries were prepared using the TruSeq Stranded mRNA kit (Illumina) according to the manufacturer's instructions. Samples were run on the Illumina HiSeq 4000 PE100. Output files were analyzed using the MUGQIC RNAseq pipeline (MUGQIC, n.d.) steps 1 through 14 on the Guillimin Genome Quebec HPC. In summary, BAM files were converted to FASTQ using Picard (BROAD Institute, n.d.), sequences were trimmed using Trimmomatic (Bolger, 2014) then aligned to the GRCh37 genome using STAR (Dobin, 2013), and raw counts were called using HTseq (Anders S, 2015). Differential expression analysis was performed using the DESeq2 R package (Love, 2014), with default parameters. GO annotations were obtained using the GOrilla web application (Eden, 2009).

**Supplementary Analysis of Overlaps (figure S2):** To understand the low overlap between DEGs in the two assessed individuals, we compared our results to other public datasets involving SWI/SNF components. We looked at several datasets in both human and mouse cell lines and primary cells in culture (Table). We re-analyzed every dataset separately using only a padj cutoff of 0.01 as some datasets did not have DEGs whose Log2FC was higher than 2. To compare DEGs between species, gene names were converted from mouse to human, then plotted using the UpSet R package. There is a high discrepancy in the number of

significant DEGs for each dataset; mouse primary late cortical progenitors with a double SMARCC1/SMARCC2 knock-out (dcKO mLCPs) only have 18 DEGs, compared to 3038 DEGs for the BRG1 knockdown in the MCF-7 human breast adenocarcinoma cell-line. Additionally, overlaps between separate datasets are scarce; the highest overlap is 236 genes between the BRG1-KD in MCF-7 cells and the BRG1-KD in HepG2 hepatocellular carcinoma cells, corresponding to 8 and 12% overlap respectively.

### Supplemental References

- Anders S, P. P. (2015). HTSeq--a Python framework to work with high-throughput sequencing data. *Bioinformatics*, *31*(2), 166-9.
- Bolger, A. M. (2014). Trimmomatic: a flexible trimmer for Illumina sequence data. *Bioinformatics*, *30*(15), 2114–2120. doi:10.1093/bioinformatics/btu170
- BROAD Institute. (n.d.). *Picard Tools*. Retrieved 2017, from <https://github.com/broadinstitute/picard>
- Conway, J.R., Lex, A., and Gehlenborg, N. (2017). UpSetR: an R package for the visualization of intersecting sets and their properties. *Bioinformatics* *33*, 2938-2940
- Dobin, A. D. (2013). STAR: ultrafast universal RNA-seq aligner. *Bioinformatics*, *29*(1), 15–21. doi:10.1093/bioinformatics/bts635
- Eden, E. N. (2009). GOrilla: A Tool For Discovery And Visualization of Enriched GO Terms in Ranked Gene Lists. *BMC Bioinformatics*, *10*(48).
- Love, M. I. (2014). Moderated estimation of fold change and dispersion for RNA-seq data with DESeq2. *Genome Biology*, *15*(12), 550. doi:10.1186/s13059-014-0550-8
- MUGQIC. (n.d.). *MUGQIC pipelines RNaseq*, 2.2.1-beta. Retrieved 2017, from [https://bitbucket.org/mugqic/mugqic\\_pipelines/src/master/pipelines/rnaseq/](https://bitbucket.org/mugqic/mugqic_pipelines/src/master/pipelines/rnaseq/)
